# Supplementary material for: TCTP protein degradation by targeting mTORC1 and signaling through S6K, Akt, and Plk1 sensitizes lung cancer cells to DNA-damaging drugs
Source: PubMed Central journal article supplement (PMC8531033; doi:10.1038/s41598-021-00247-0), 2021-10-21

## **Supplementary Material**

**TCTP protein degradation by targeting mTORC1 and signaling through S6K, Akt and Plk1 sensitizes lung cancer cells to DNA-damaging drugs**

**Mini Jeong, Mi Hyeon Jeong, Jung Eun Kim, Serin Cho, Kyoung Jin Lee, Serkin Park, Jeongwon Sohn, Yun Gyu Park**

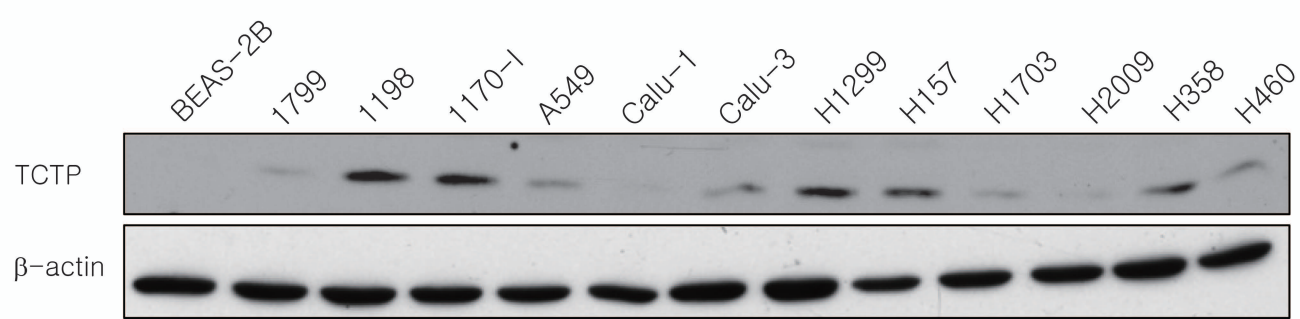

**Supplementary Fig. S1.** TCTP protein levels were determined in various lung cancer cells including human lung carcinogenesis model cell lines (BEAS-2B, 1799, 1198, and 1170-I cells). Total proteins were analyzed by immunoblotting.  $\beta$ -actin was used as an internal control. Duplicate experiments were performed.

A

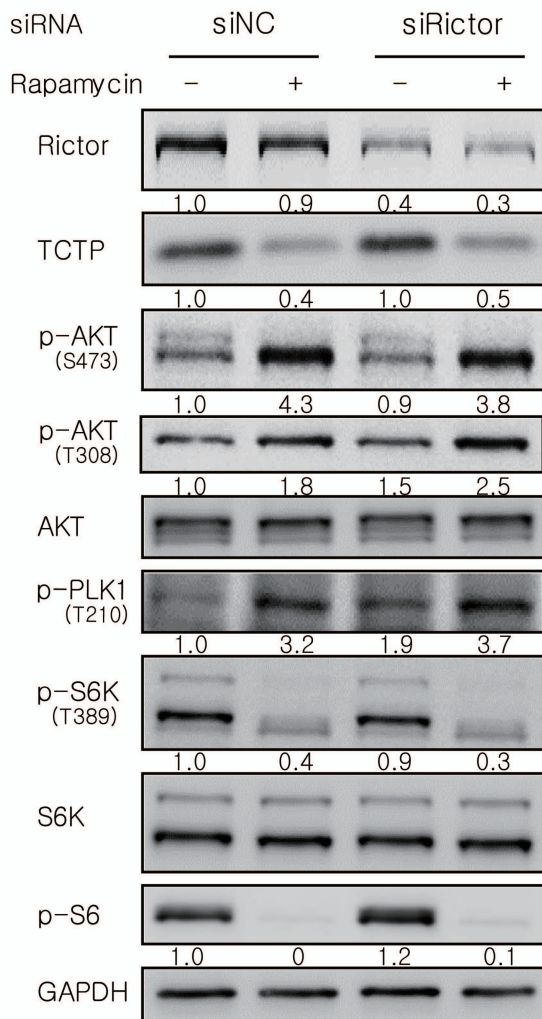

B

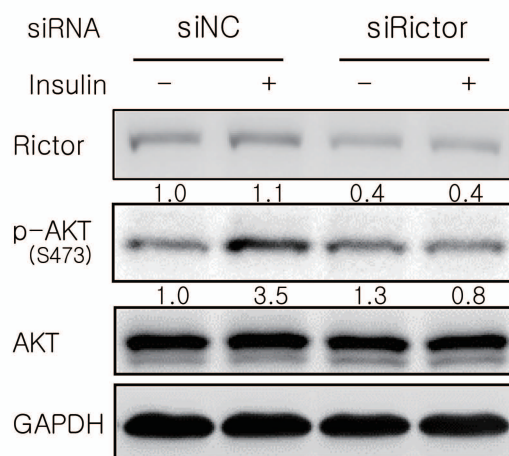

**Supplementary Figures S2.** mTORC2 inhibition had no effect on TCTP degradation and the activation of Akt and PLK1 by rapamycin. (A) Transfection with Rictor siRNA had no effect on TCTP degradation and the activation of Akt and PLK1 by rapamycin. (B) Rictor siRNA used in Supplementary Fig. S2A effectively suppresses mTORC2 activity. A549 cells were transfected with 100 pM siRNA for 24 hours and then treated with 100 pM rapamycin (A) or 4  $\mu$ g/ml of insulin (B) for 24 hours. Cell lysates were analyzed by immunoblotting. The band intensities were quantified and normalized to those of internal controls or the total forms, and fold changes compared with controls are presented as numbers below the bands. GAPDH protein was used as an internal control. Triplicate experiments were performed.

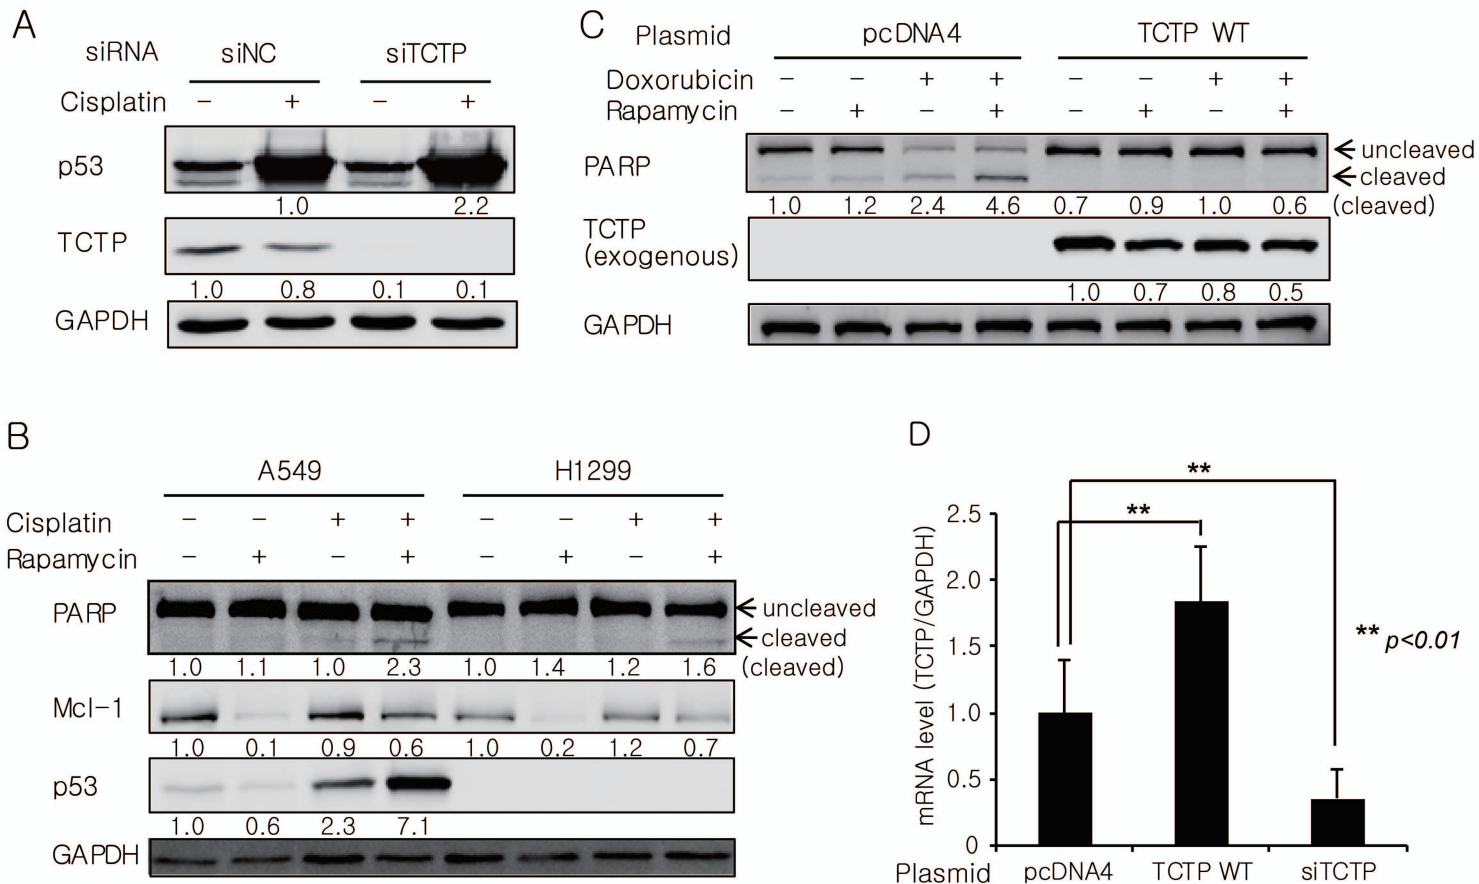

**Supplementary Figure S3.** TCTP is involved in cell survival against DNA-damaging agents. (A) TCTP knockdown by siRNA transfection enhanced p53 induction by cisplatin. A549 cells were transfected with TCTP siRNA or negative control siRNA at a final concentration of 100 pM for 24 hours and treated with 5  $\mu$ M cisplatin for 3 days. (B) Irrespective of the functional status of p53, co-treatment with cisplatin and rapamycin increased the cleaved form of PARP and decreased Mcl-1. A549 cells were treated with 200 pM rapamycin and/or 10  $\mu$ M cisplatin. H1299 cells were treated with 200 pM rapamycin and/or 30  $\mu$ M cisplatin. After 24 hours, the cells were harvested and analyzed. (C) Overexpression of wild-type TCTP abolished the synergistic effect of rapamycin and doxorubicin on the change in protein level of cleaved PARP. A549 cells were transfected with 5.5  $\mu$ g of a plasmid expressing wild-type TCTP or an empty vector (pcDNA4, as the negative control) for 24 hours and treated with 100 pM rapamycin and/or 4  $\mu$ M doxorubicin for 3 days. (D) The overexpression and knockdown of TCTP were confirmed using qRT-PCR. A549 cells were transfected with 5.5  $\mu$ g of plasmid expressing wild-type TCTP or empty vector (pcDNA4) or 100 pM TCTP siRNA for 24 hours. Total protein was analyzed by immunoblotting and GAPDH protein was used as an internal control (A, B, and C). The band intensities were quantified and normalized to those of internal controls and fold changes compared with controls are presented as numbers below the bands. Total cellular RNA was extracted and analyzed by qRT-PCR and the TCTP mRNA levels were normalized to GAPDH mRNA levels (D). Triplicate experiments were performed.

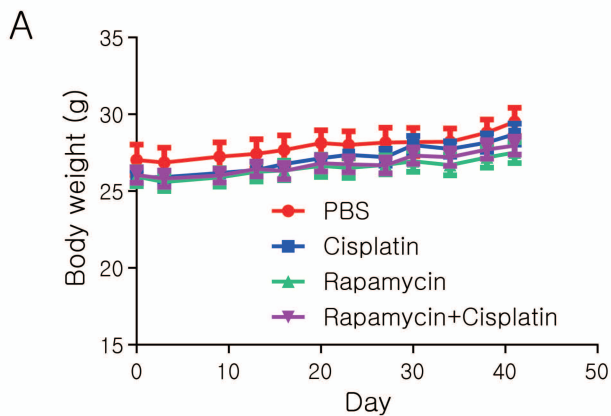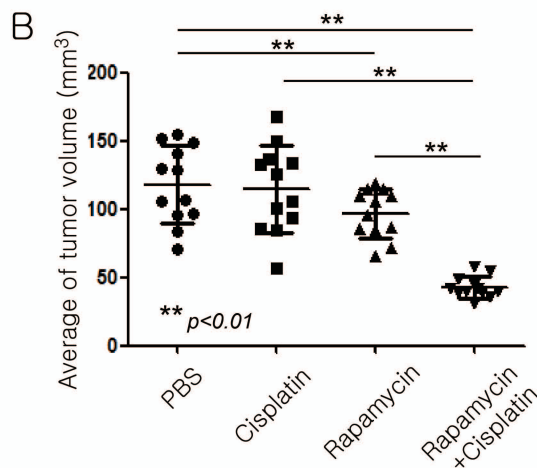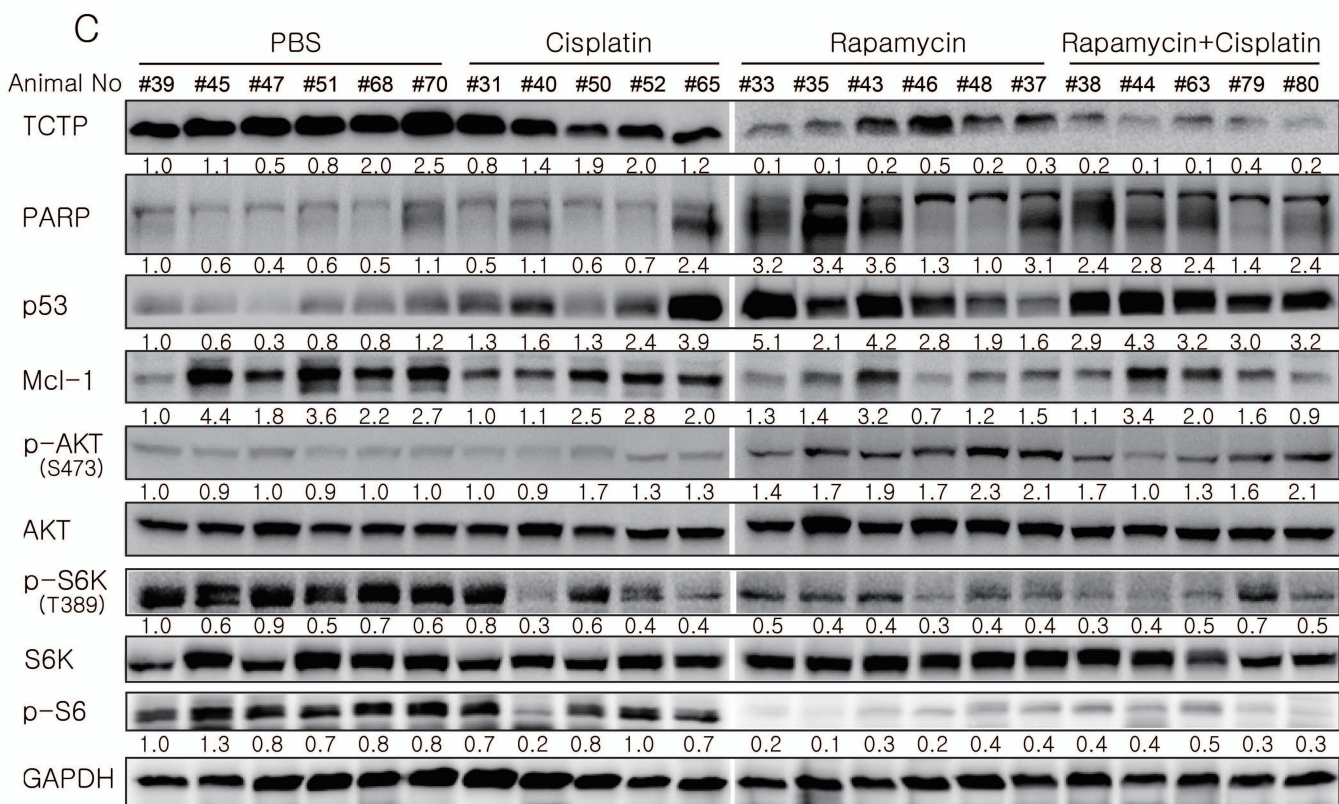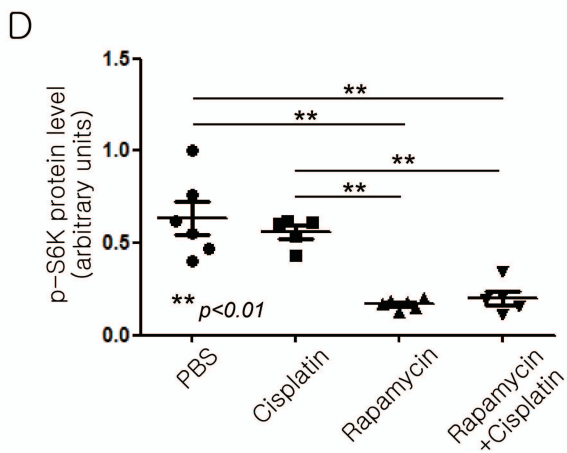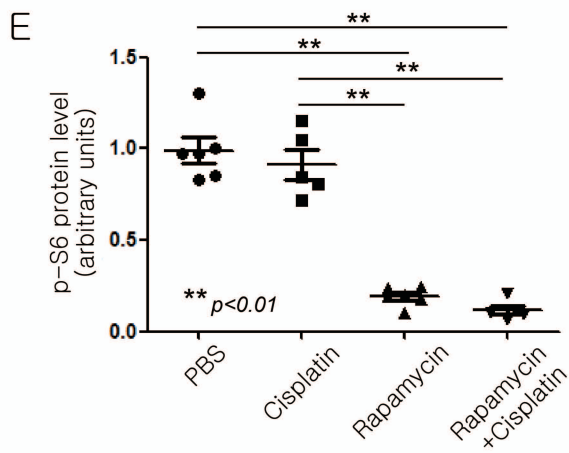

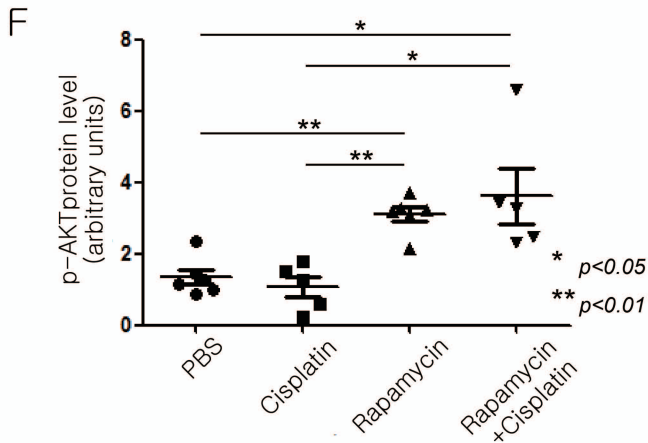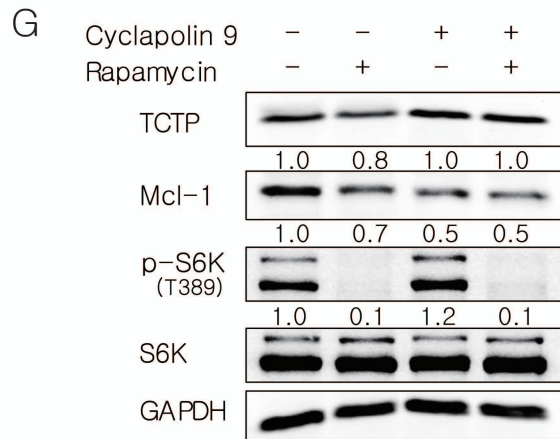

**Supplementary Figure S4.** Rapamycin augments the efficacy of cisplatin and induces S6K inhibition and Akt activation in an A549 lung cancer xenograft model. (A) The body weight of the mice was measured as an indicator of general health conditions. (B) The within-group of tumor volumes (mm<sup>3</sup>) at each measurement point (shown in Fig. 7B) are cumulatively presented as means  $\pm$  SD. (C) Tumor tissue homogenates were analyzed by immunoblotting and triplicate experiments were performed. (D-F) The expression levels of p-S6K1, p-S6, and p-Akt obtained in Supplementary Fig. S4C were quantified, normalized to the total forms or GAPDH, and are presented as the mean  $\pm$  SD. (G) Down-regulation of Mcl-1 expression by rapamycin was abolished by pretreatment with PLK1 inhibitor. A549 cells were preincubated for 2 hours with 5  $\mu$ M cyclapolin 9 and then treated for 24 hours with 100 pM rapamycin.

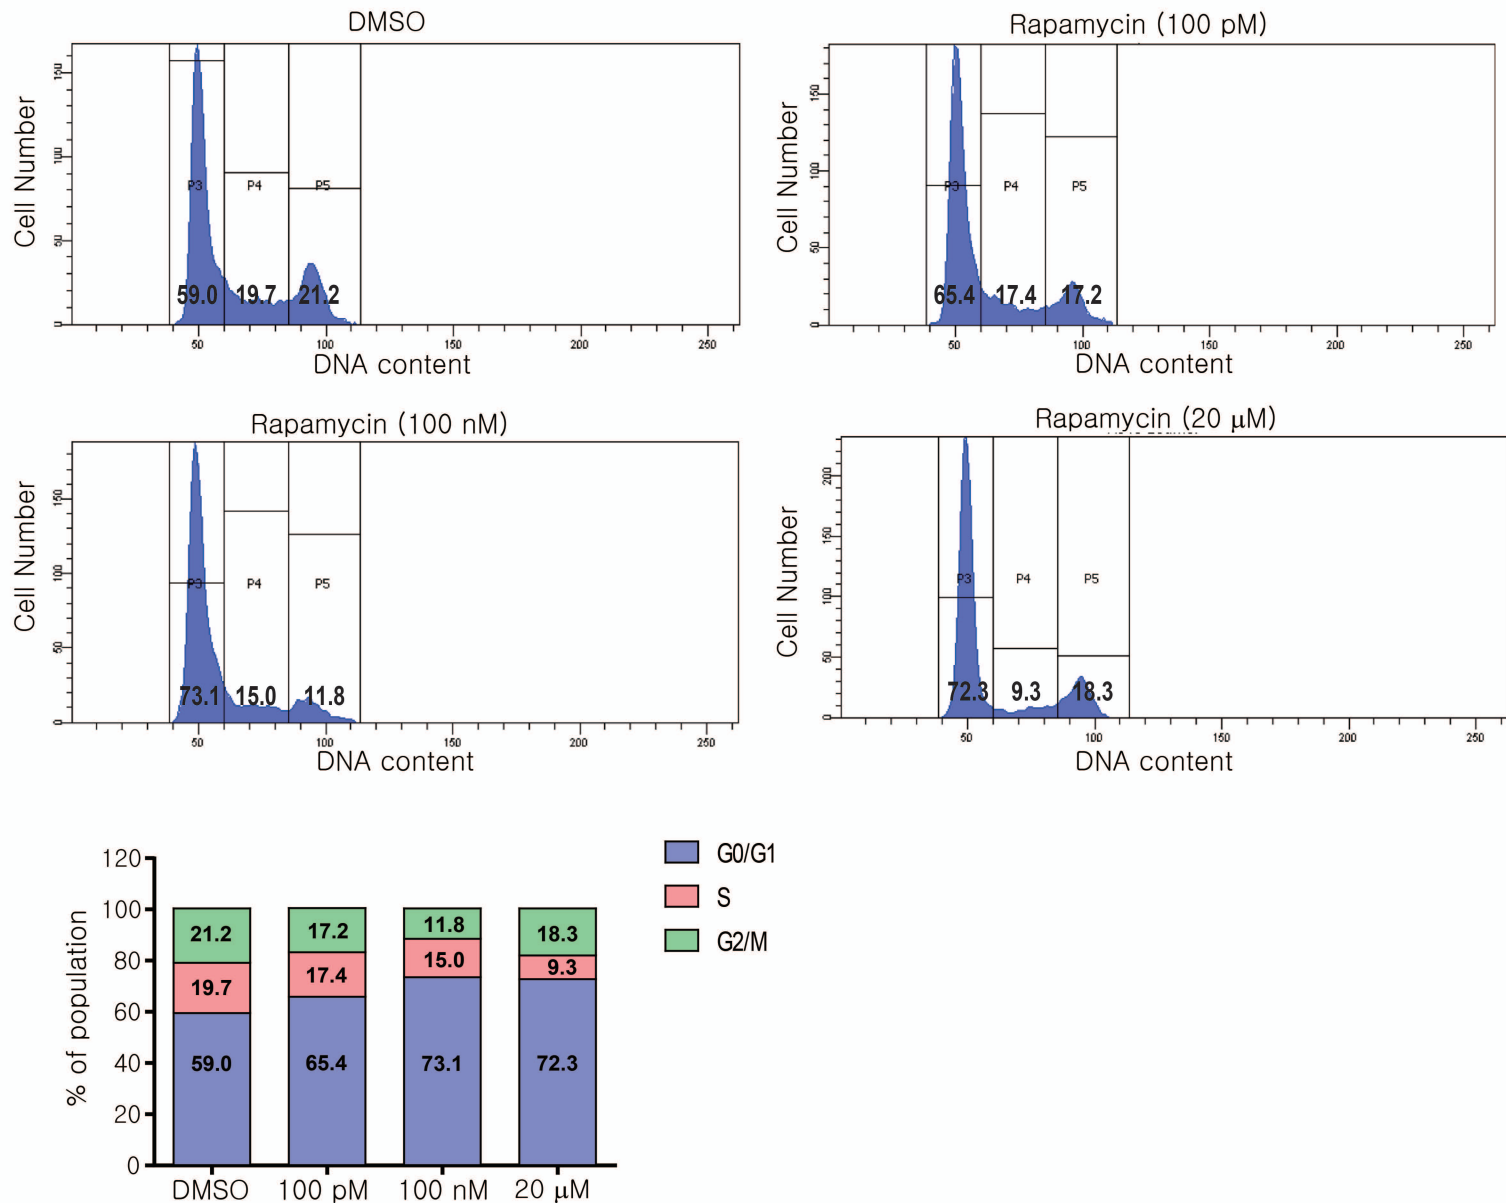

**Supplementary Figure S5.** Treatment with 100 pM rapamycin, a concentration adequate to reduce the TCTP protein level, has little effect on cell cycle progression. Non-synchronized A549 cells were treated for 24 hours with various concentrations of rapamycin. For analysis of DNA content, cells were stained for 30 minutes at 37°C using Dulbecco's phosphate buffered saline containing 100 μg/ml of propidium iodide and 20 μg/ml of RNase, and the percentages of cells in the G1, S, and G2/M phases of the cell cycle were determined by flow cytometry. DNA content histograms and cell cycle distributions are shown in the upper and lower panels, respectively. Duplicate experiments were performed.

A

| Primers for plasmid construction |         |                                           |
|----------------------------------|---------|-------------------------------------------|
| TCTP(Ser46Ala)                   | Forward | 5'-ATTGATGAC <u>GCG</u> CTCATTGG-3'       |
|                                  | Reverse | 5'-CCACCAATGAG <u>GCG</u> GTCA-3'         |
| TCTP (Ser64Ala)                  | Forward | 5'-GCGAAGGTACCGAA <u>GCA</u> ACAG-3'      |
|                                  | Reverse | 5'- ACCAGTGATTACTGT <u>TGC</u> TTCCGGT-3' |
| TCTP (Thr65Val)                  | Forward | 5'-GCGAAGGTACCGAAAGC <u>GTA</u> GT-3'     |
|                                  | Reverse | 5'-GACACCAGTGATTAC <u>TAC</u> GCTTTTCG-3' |

B

| The sequences of siRNAs              |                                  |
|--------------------------------------|----------------------------------|
| Raptor (NM_020761.2)                 | 5'-CCUCACUUUAAUUUCCAUGU(dTdT)-3' |
| Rictor (NM_001285439.2)              | 5'- GUCCUUCACGAGAGACAGU(dTdT)-3' |
| PLK1 (NM_005030.3)                   | 5'-CCGGGAAAAAGAAGAACCAG(dTdT)-3' |
| TCTP (NM_003295.2)                   | 5'- GCAUGGUUGCUCUAUUGGA(dTdT)-3' |
| GFP                                  | 5'-GCAUCAAGGUGAACUUCAA(dTdT)-3'  |
| AccuTarget<br>Negative control siRNA | 5'-CCUACGCCACCAAUUUCGU(dTdT)-3'  |

C

| Primers for qRT-PCR    |         |                              |
|------------------------|---------|------------------------------|
| TCTP (NM_003295.2)     | Forward | 5'-ATCCAGATGGCATGGTTGCT-3'   |
|                        | Reverse | 5'-CGCAGGGATTTCTTTCTTTTGC-3' |
| GAPDH (NM_001256799.3) | Forward | 5'-CAATGACCCCTTCATTGACC-3'   |
|                        | Reverse | 5'-GATCTCGCTCCTGGAAGATG-3'   |



D

| Name                  | Supplier                  | Cat no.   |
|-----------------------|---------------------------|-----------|
| TCTP                  | Abcam                     | ab37506   |
| phospho-TCTP-Ser46    | Cell Signaling Technology | 5251      |
| Raptor                | Cell Signaling Technology | 2280      |
| Rictor                | Cell Signaling Technology | 2114      |
| S6K                   | Cell Signaling Technology | 2708      |
| phospho-S6K-T389      | Cell Signaling Technology | 9234      |
| Cdc25C                | Cell Signaling Technology | 4688      |
| phospho-Cdc25C-Ser198 | Cell Signaling Technology | 9529      |
| Akt                   | Cell Signaling Technology | 9272      |
| phospho-Akt-T308      | Cell Signaling Technology | 9275      |
| phospho-Akt-S473      | Cell Signaling Technology | 9271      |
| PLK1                  | Cell Signaling Technology | 4513      |
| phospho-PLK1-Thr210   | Cell Signaling Technology | 9062      |
| phospho-S6            | eBioscience               | 14-9007   |
| Ubiquitin             | Santa Cruz Biotech        | sc-8017   |
| HA                    | Santa Cruz Biotech        | sc-7392   |
| GAPDH                 | Santa Cruz Biotech        | sc-32233  |
| Mcl-1                 | Santa Cruz Biotech        | sc-12756  |
| PARP                  | Santa Cruz Biotech        | sc-8007   |
| p53                   | Santa Cruz Biotech        | sc-126    |
| $\beta$ -actin        | AB Frontier, Korea        | LF-PA0209 |
| $\alpha$ -tubulin     | AB Frontier, Korea        | LF-PA0146 |

**Supplementary Table S1.** (A) Primers for plasmid construction (B) The sequences of siRNAs (C) Primers for qRT-PCR (D) Antibody information

# **Supplementary Information**

**(Original blot/gel images)**

**TCTP protein degradation by targeting mTORC1 and signaling through S6K, Akt and Plk1 sensitizes lung cancer cells to DNA-damaging drugs.**

**Mini Jeong, Mi Hyeon Jeong, Jung Eun Kim, Serin Cho, Kyoung Jin Lee, Serkin Park,  
Jeongwon Sohn, Yun Gyu Park**

Figure 1A

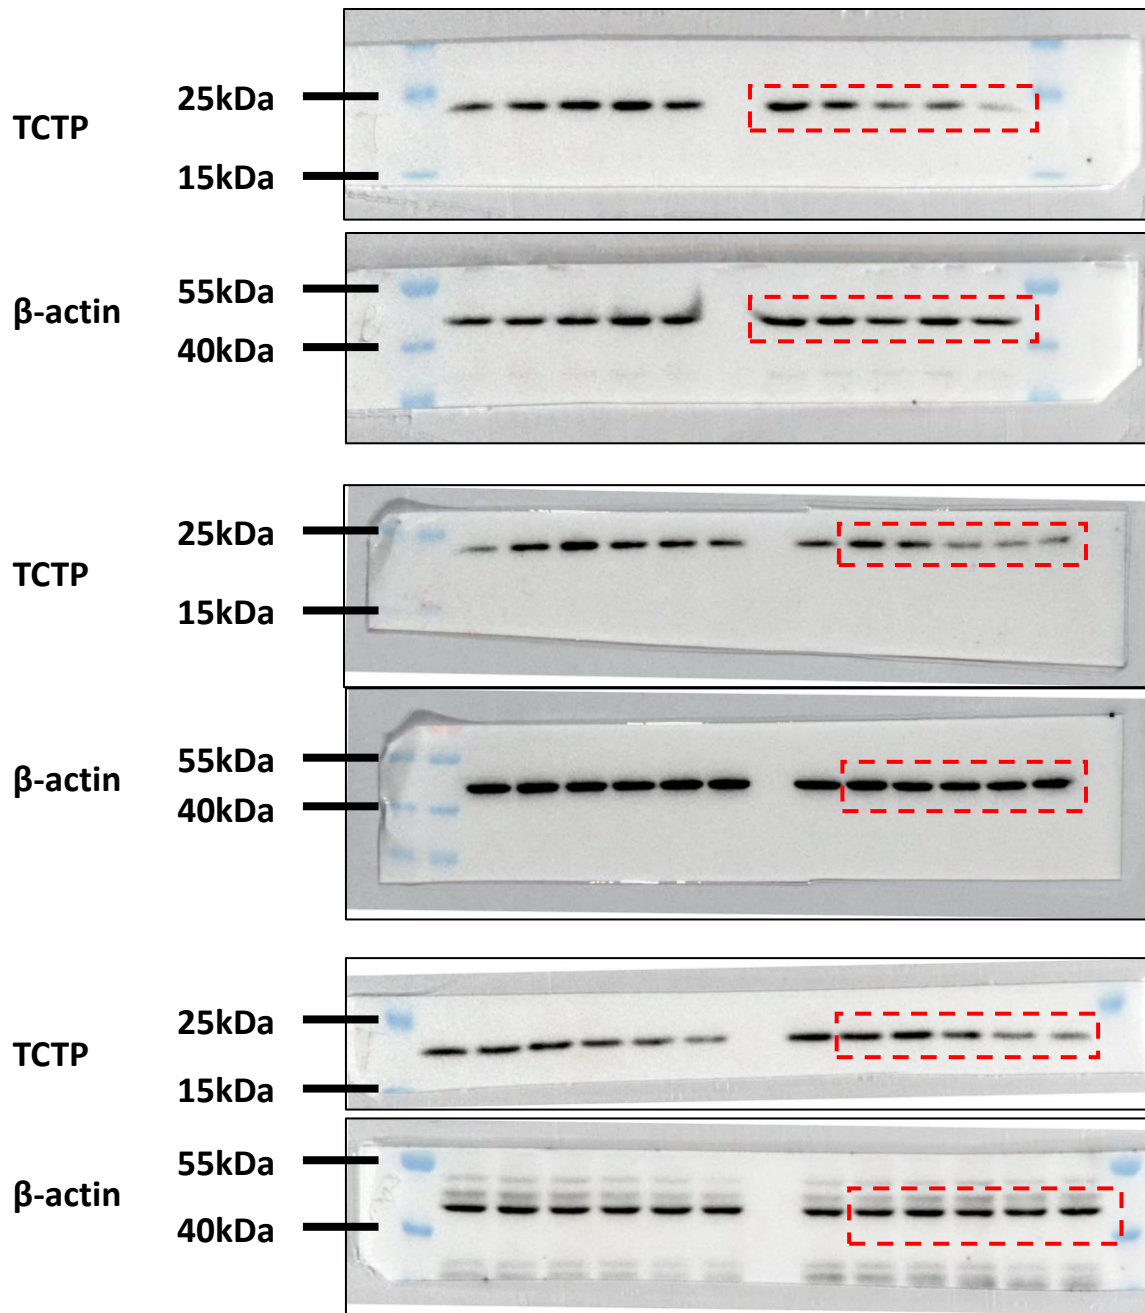

Figure 1C

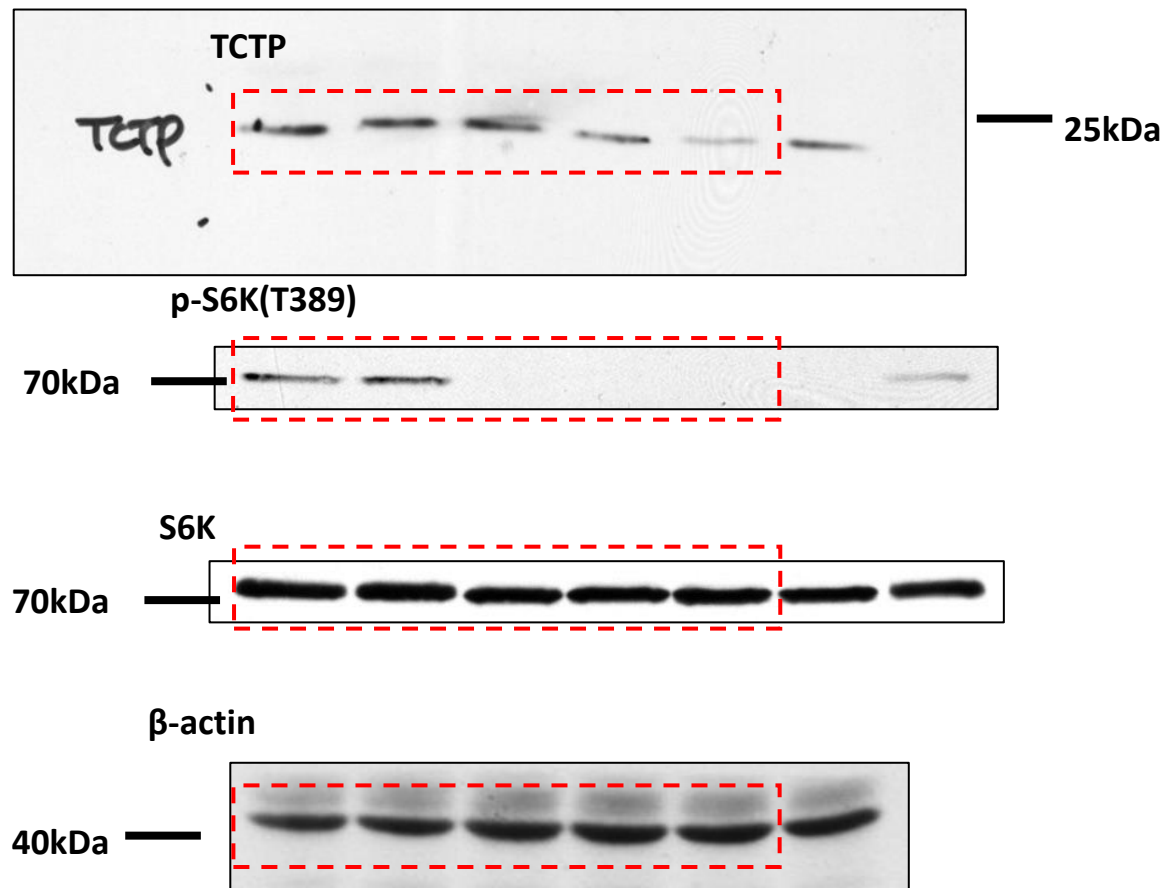

Figure 1D

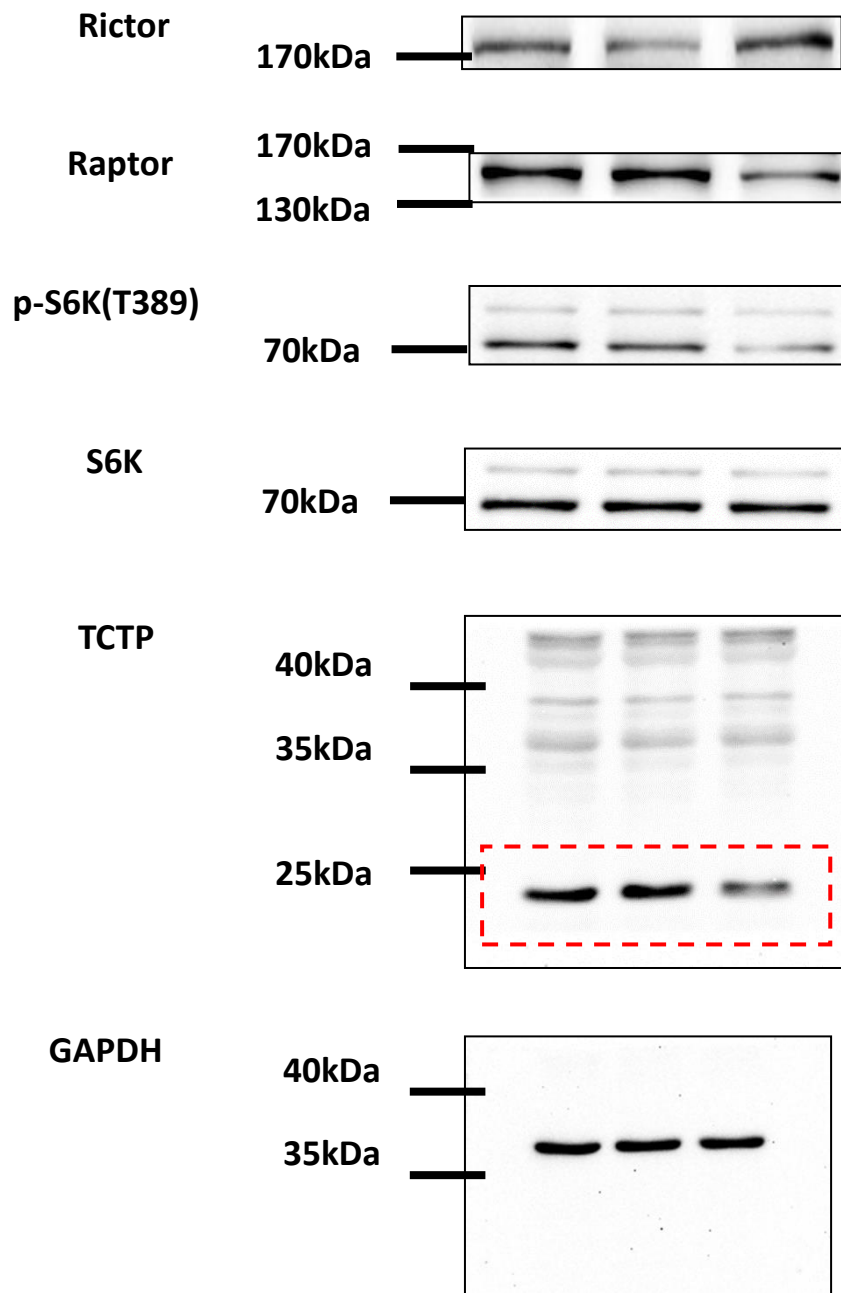

Figure 1E

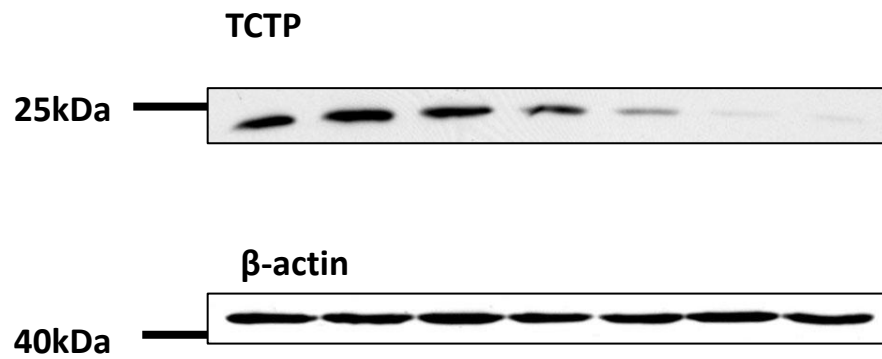

Figure 2A

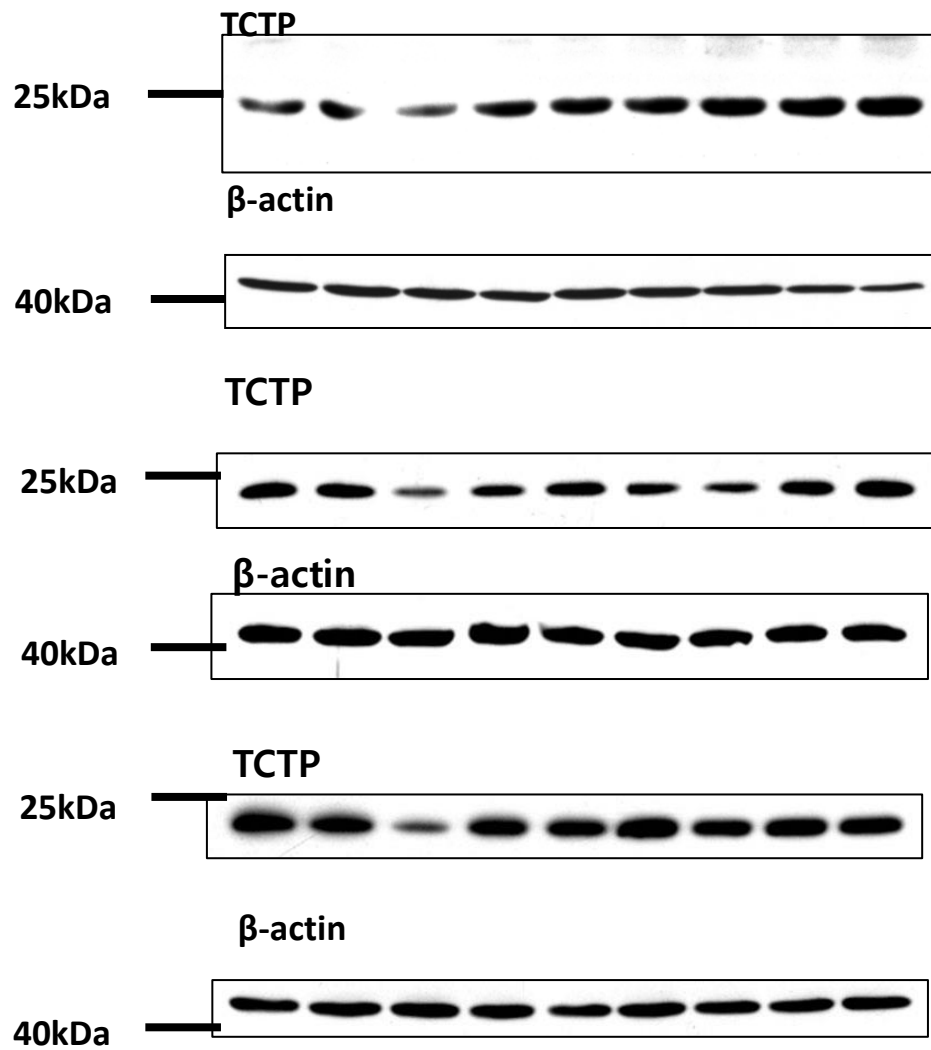

Figure 2B

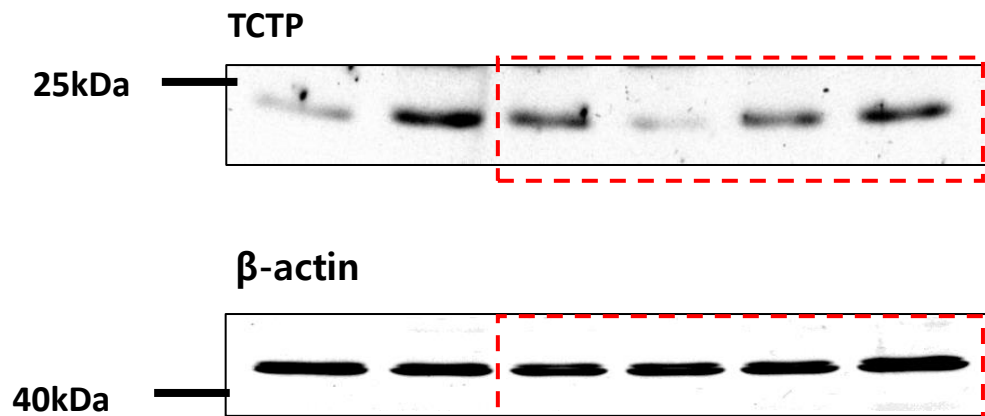

Figure 2C

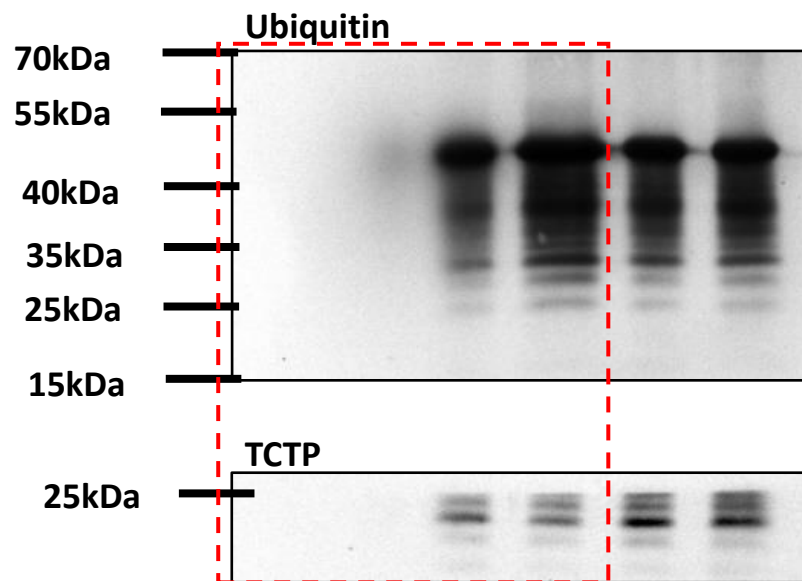



Figure 2D

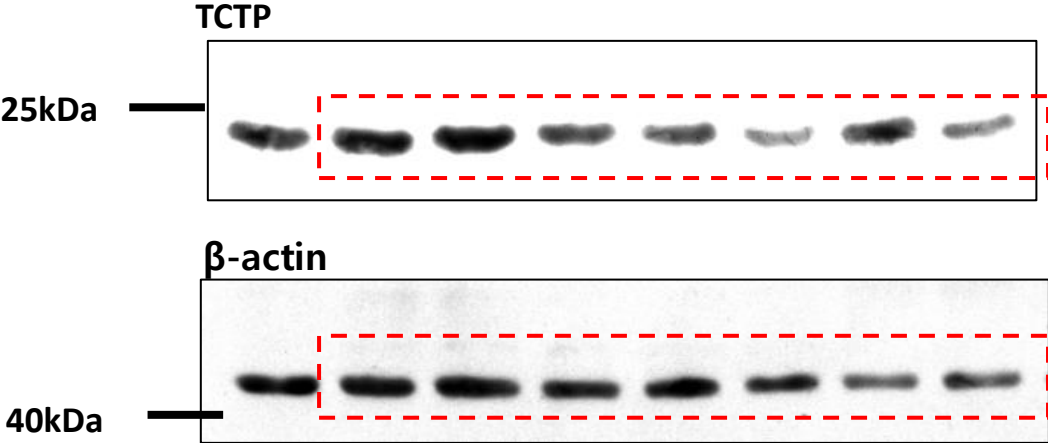

Figure 3A

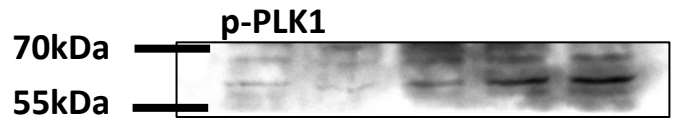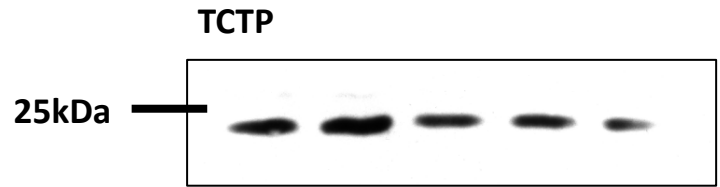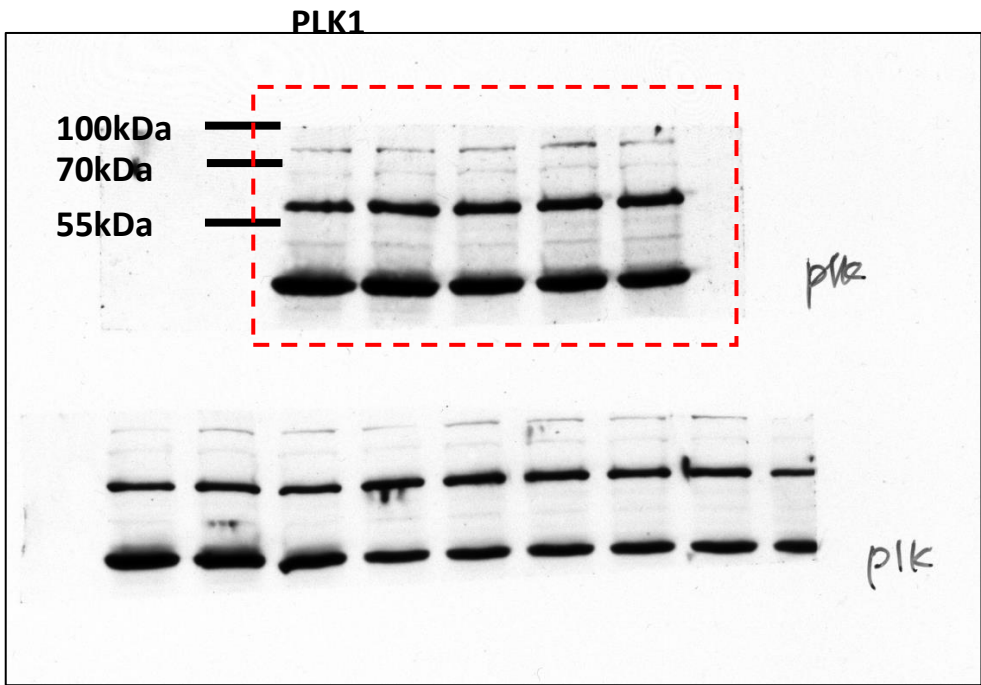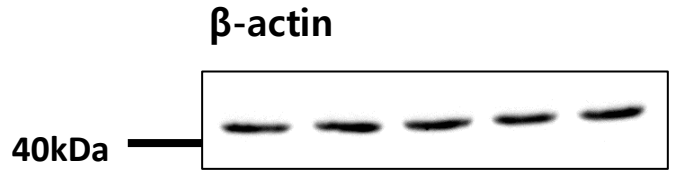

Figure 3A

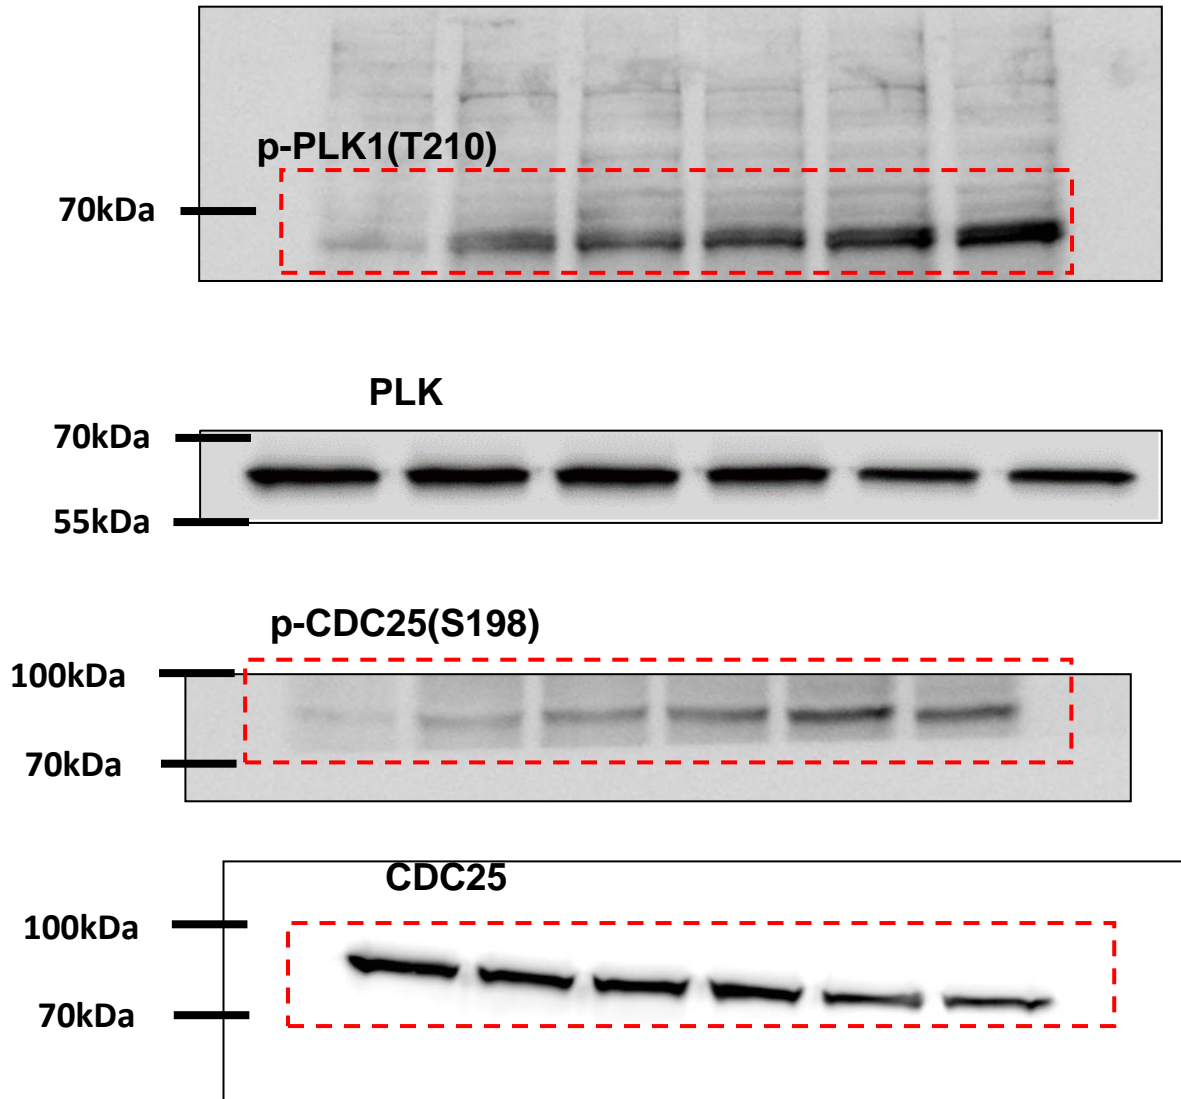

Figure 3B

A549

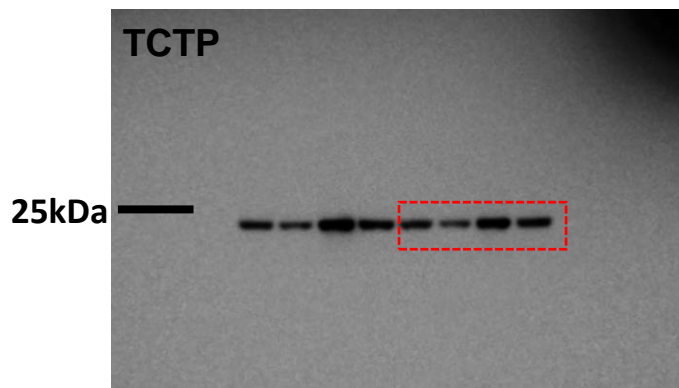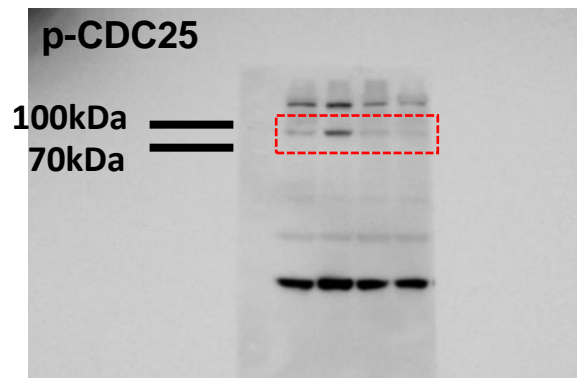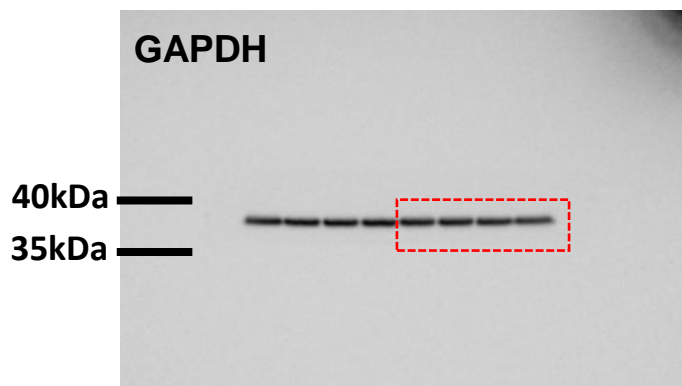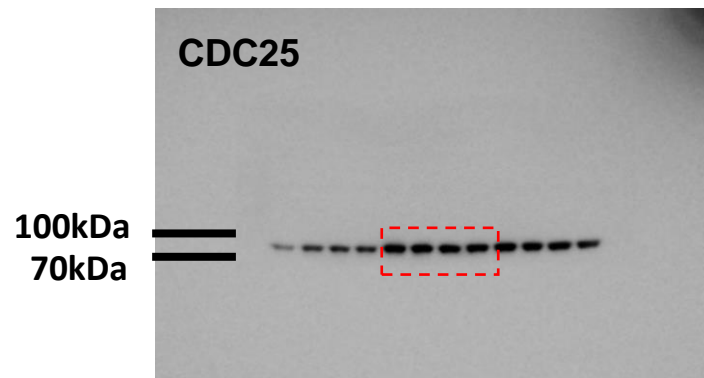

H1299

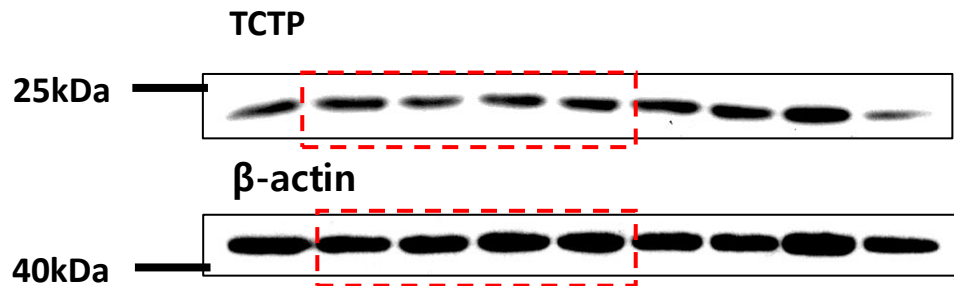

H157

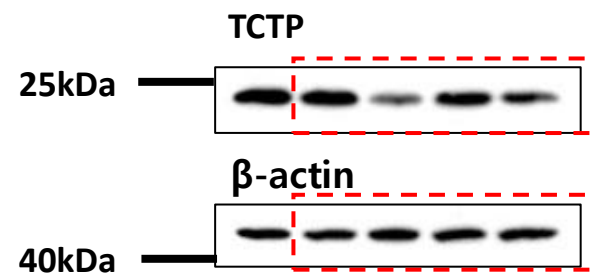

Figure 3C

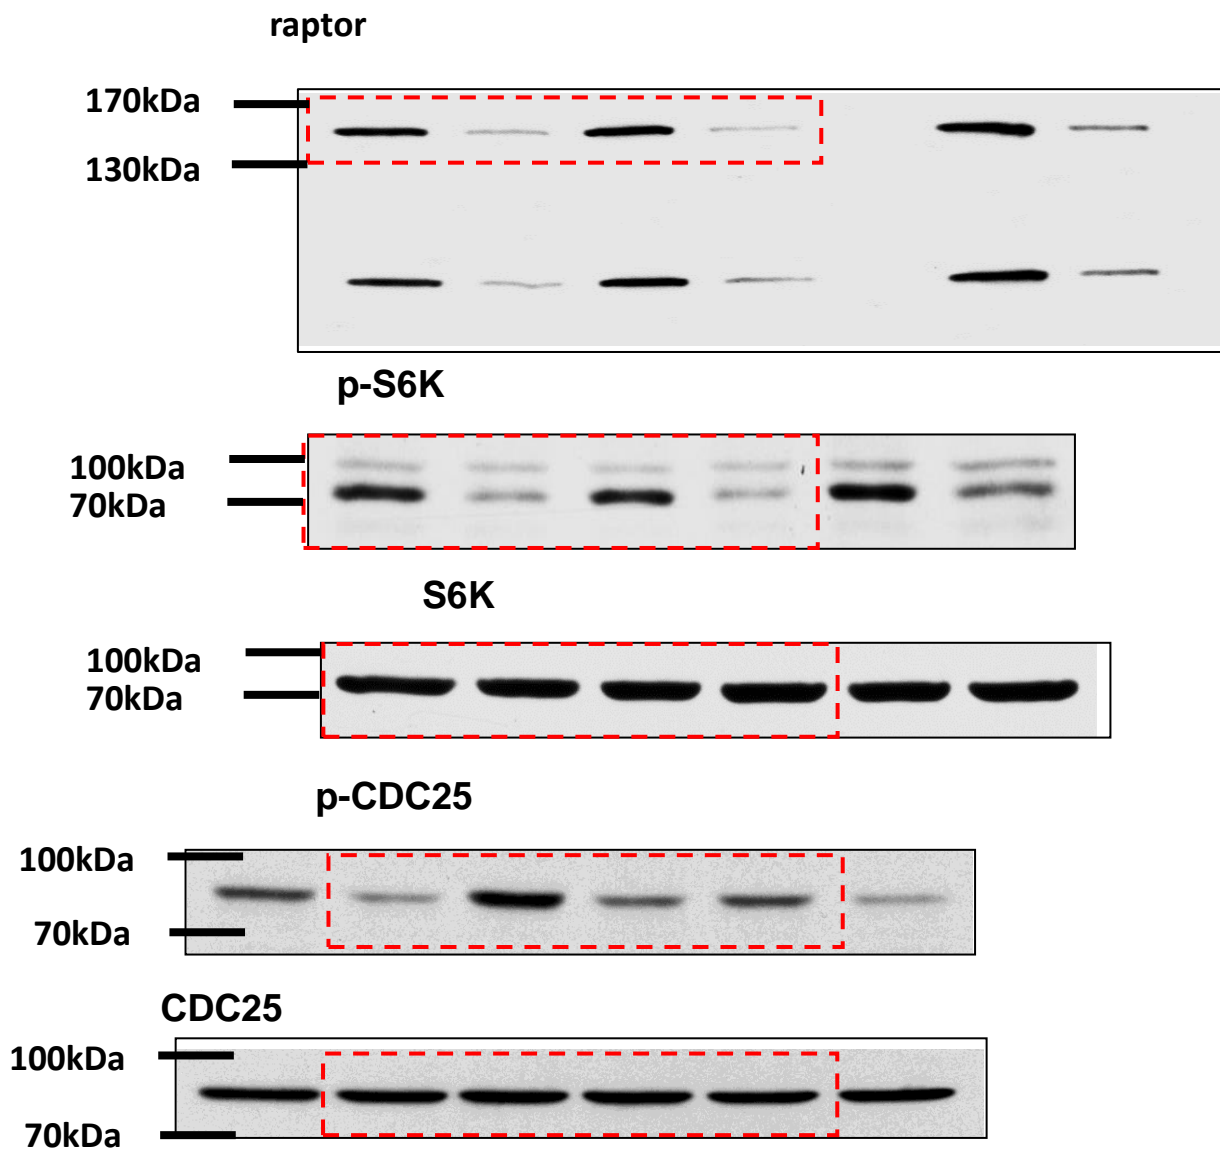

Figure 3C

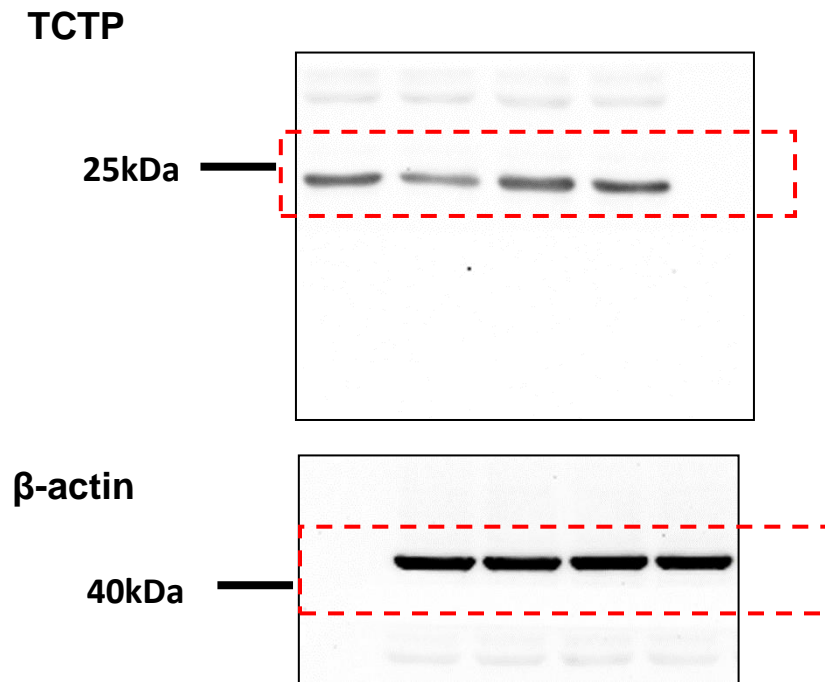

Figure 3D

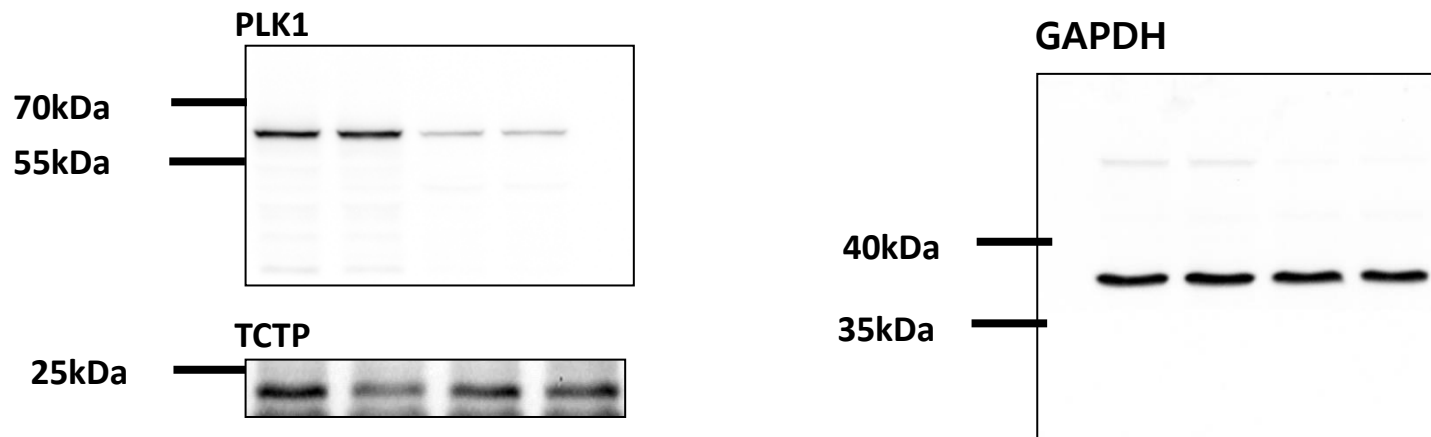

Figure 3E

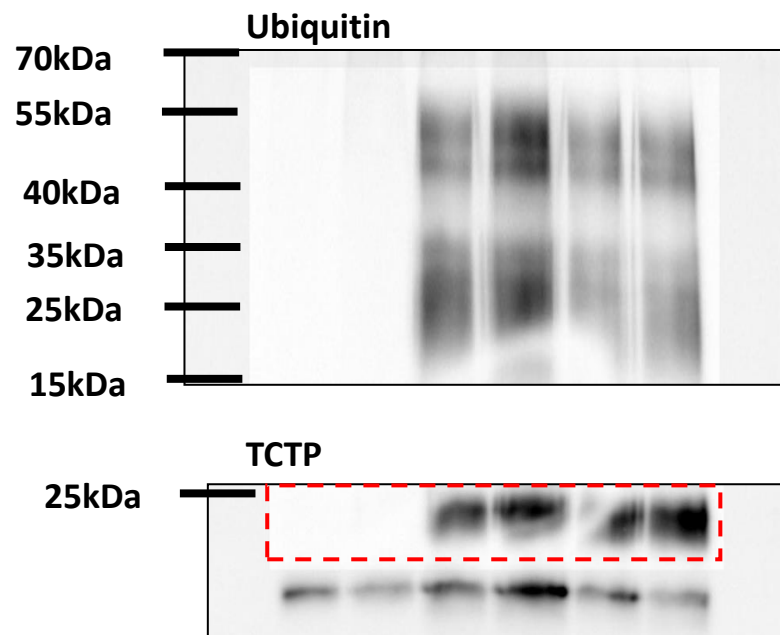

Figure 4A

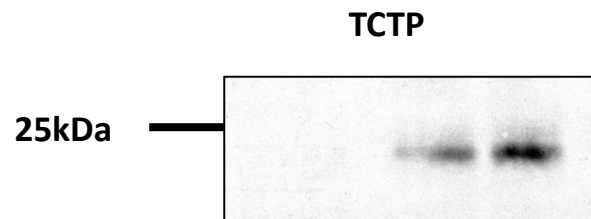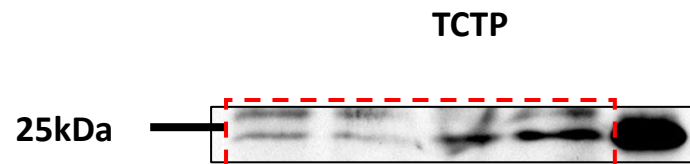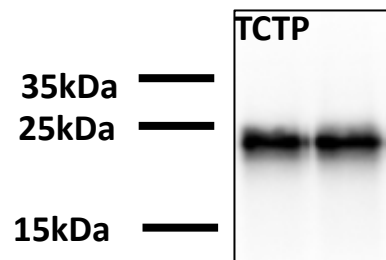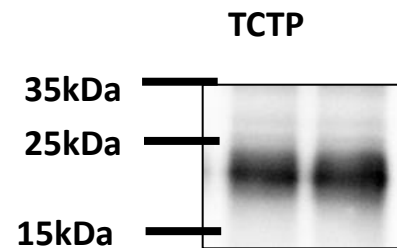



Figure 4B

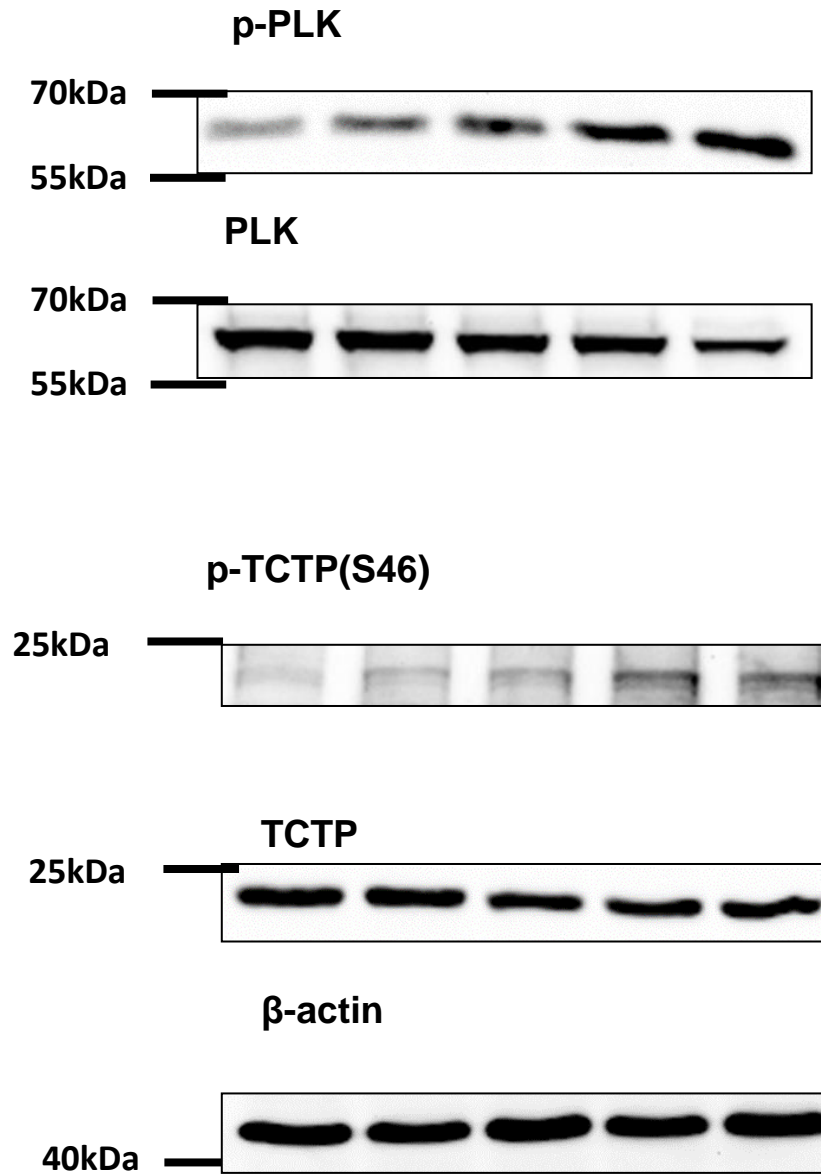

Figure 4C

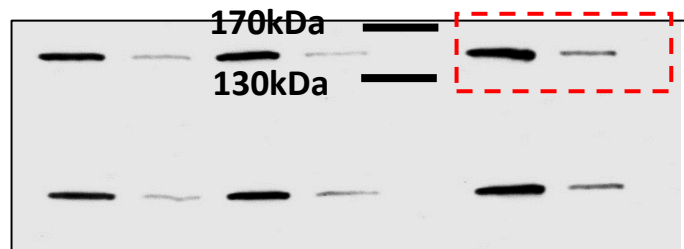

raptor

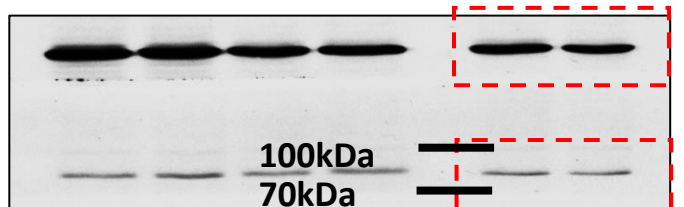

PLK

S6K

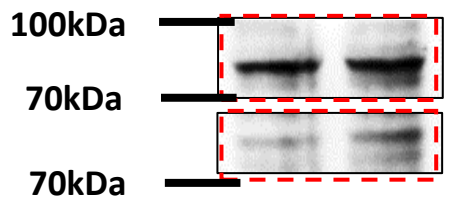

CDC25  
p-Cdc25C  
(S198)

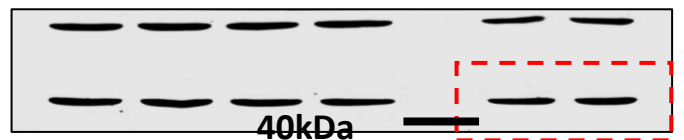

$\beta$ -actin

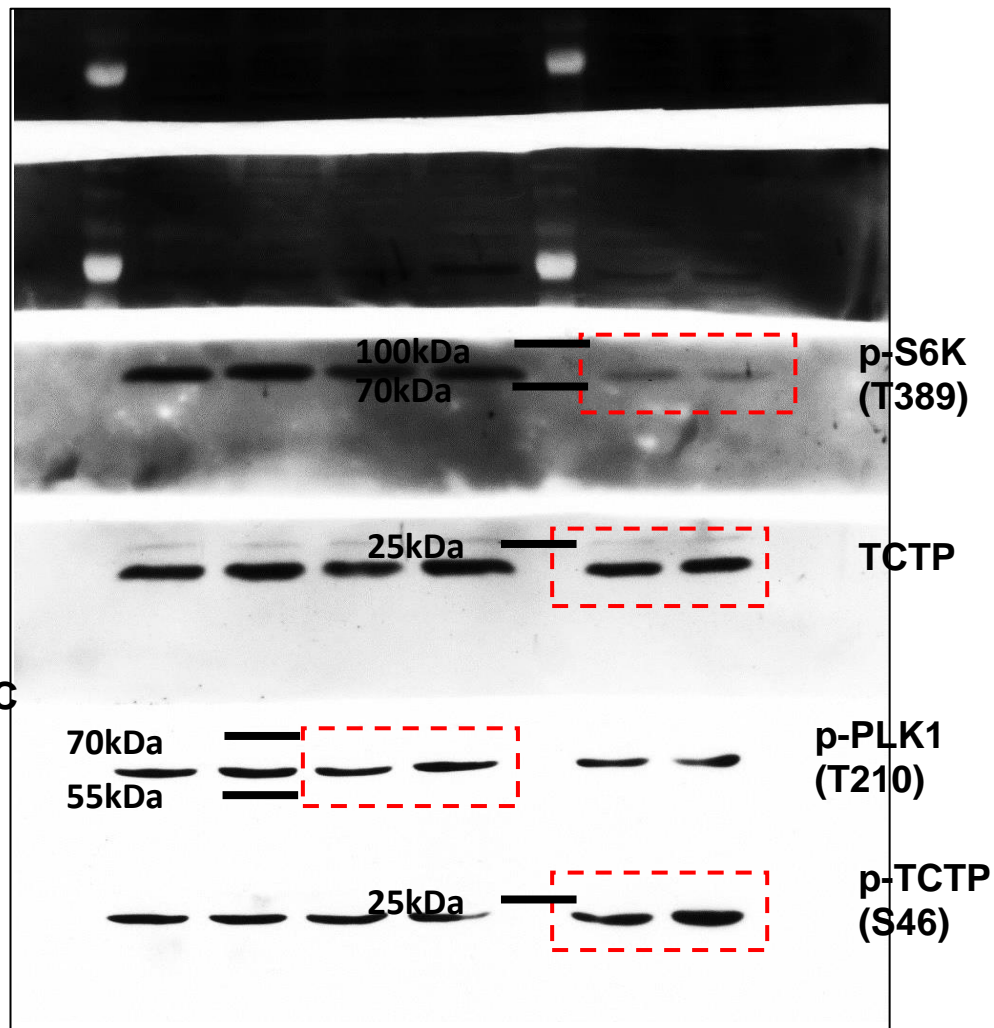

p-S6K  
(T389)

TCTP

p-PLK1  
(T210)

p-TCTP  
(S46)

Figure 4D

p-TCTP

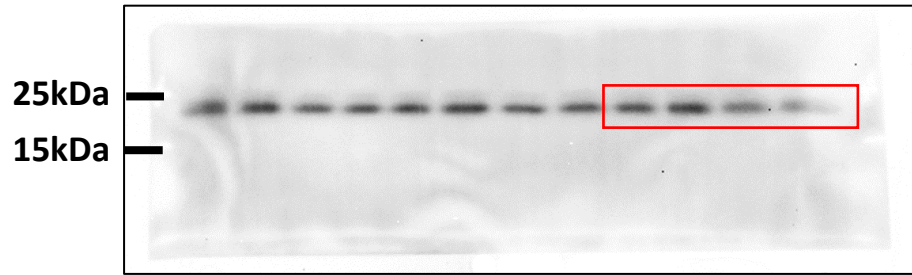

p-PLK1

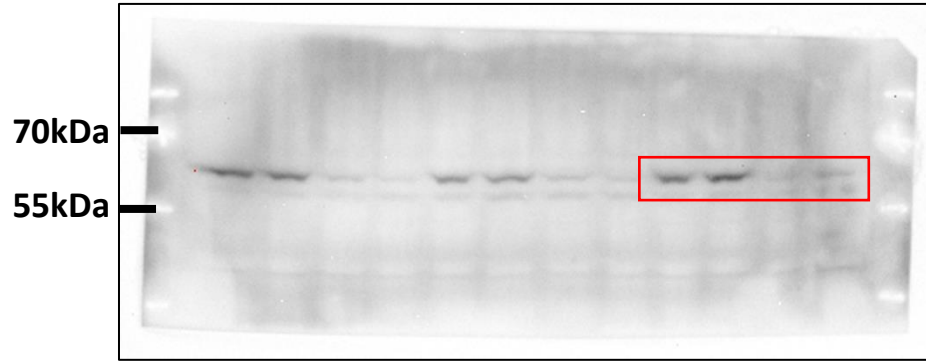

TCTP

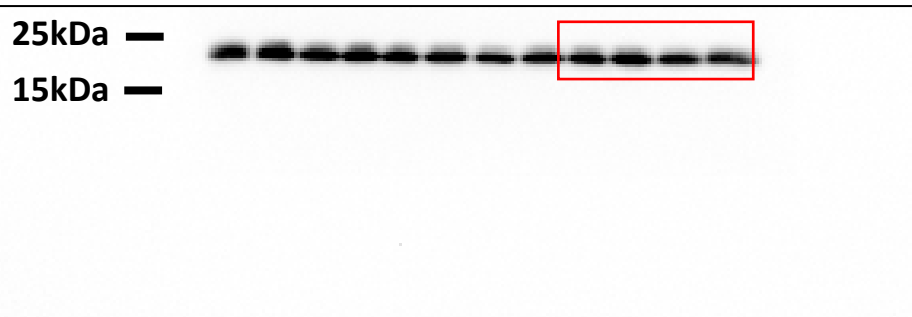

PLK1

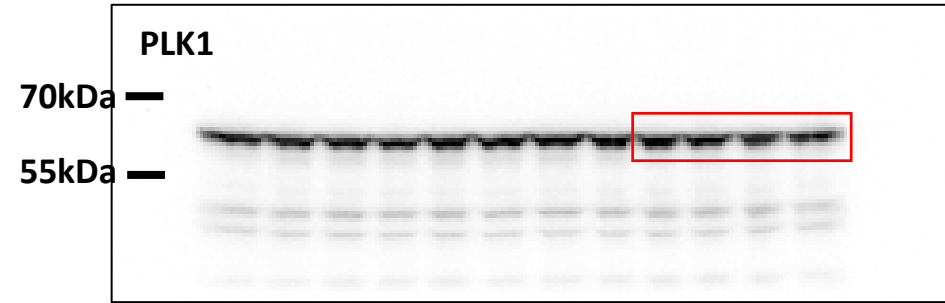

GAPDH

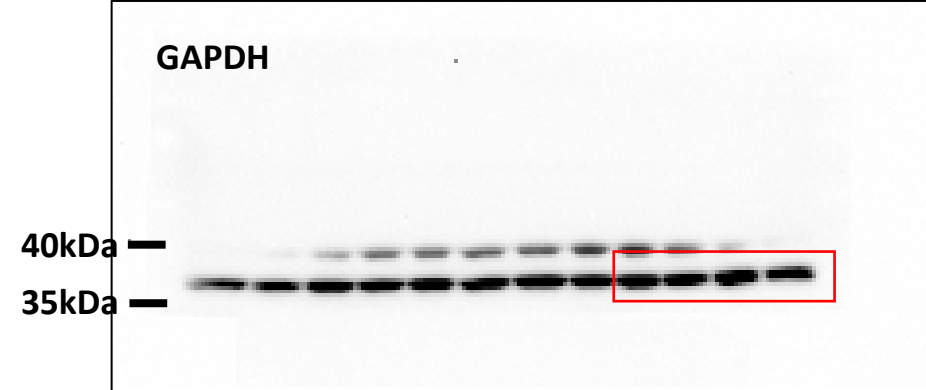

Figure 4E

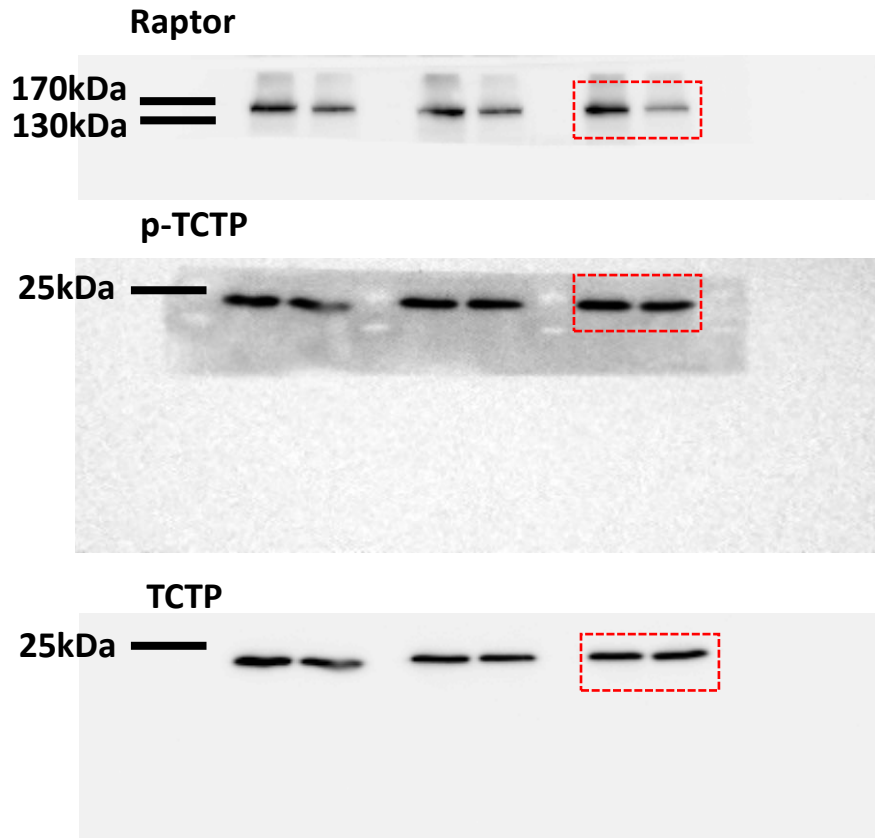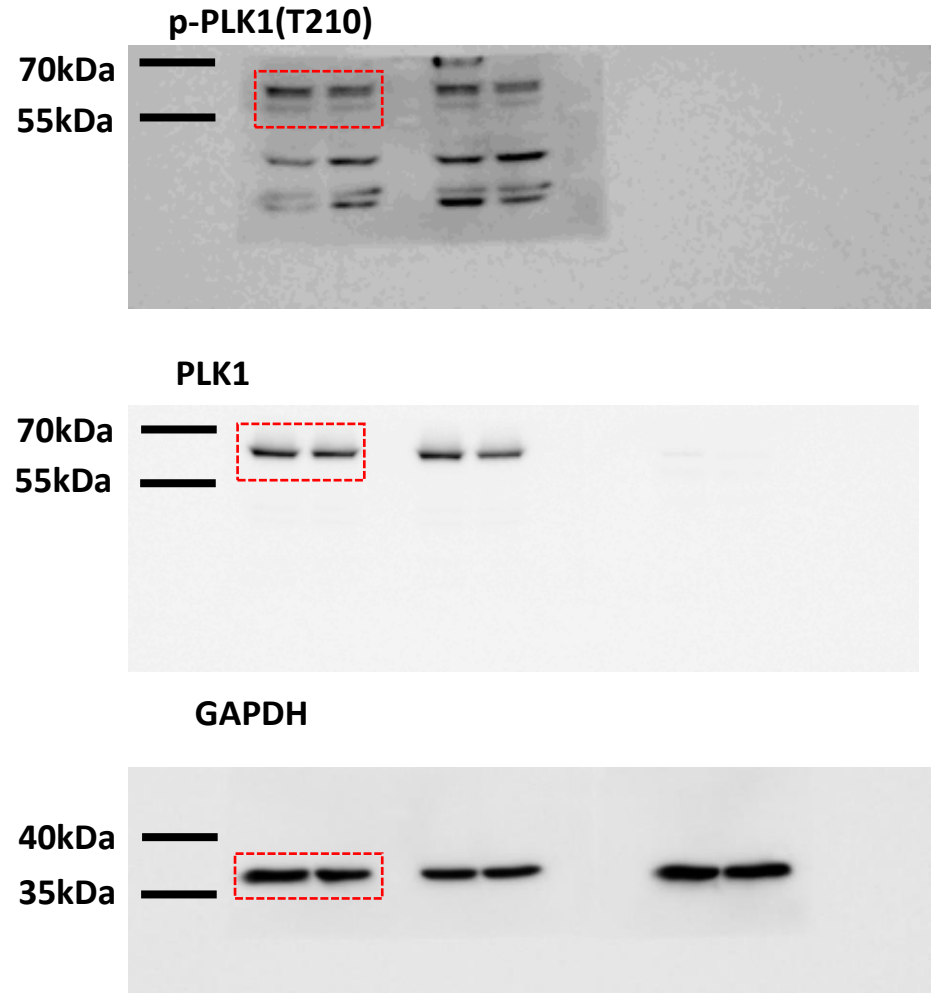

Figure 4F

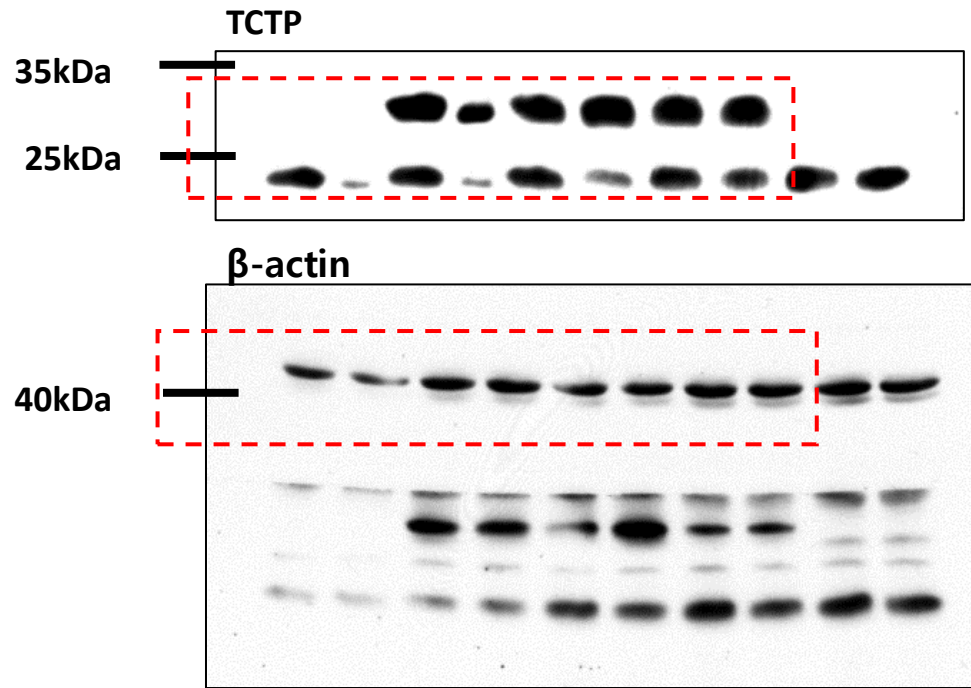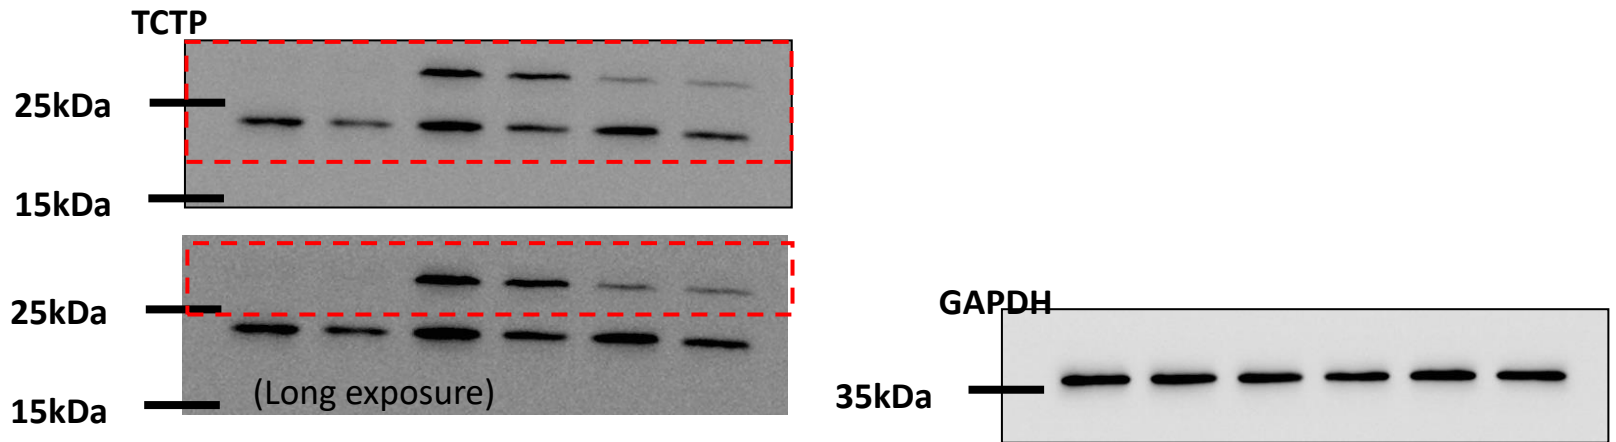

Figure 5A

p-AKT (S473)

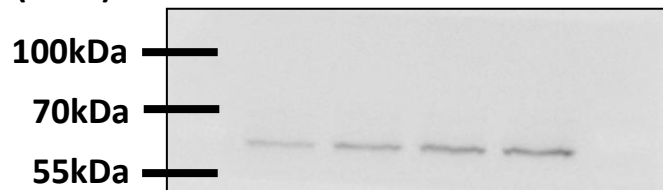

p-AKT (T308)

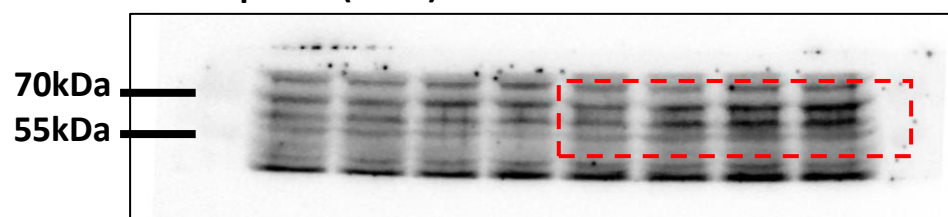

AKT

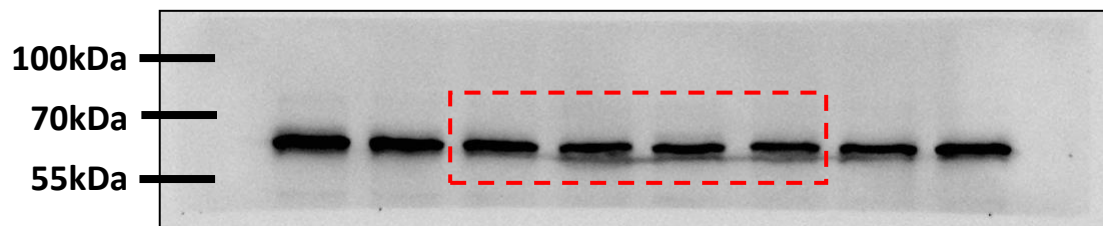

p-S6K

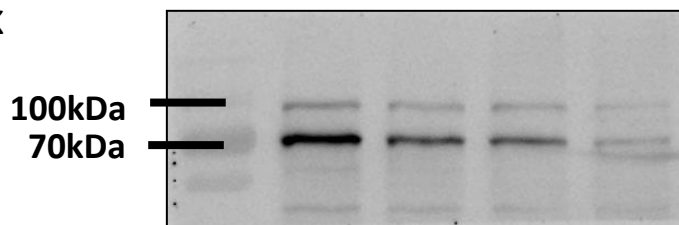

S6K

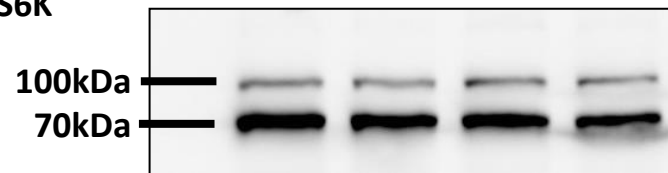

GAPDH

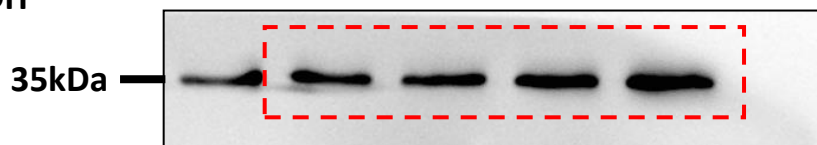

p-S6

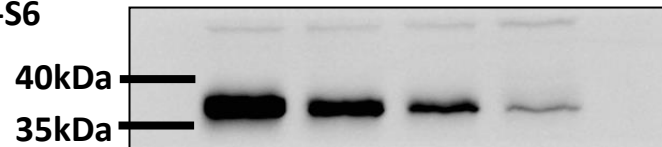

TCTP

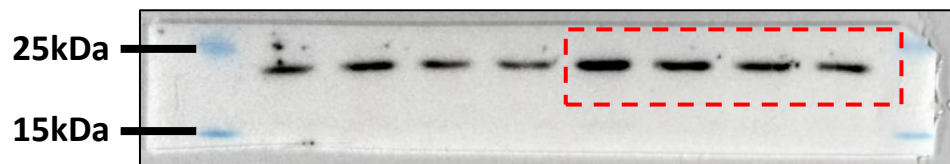

Figure 5B

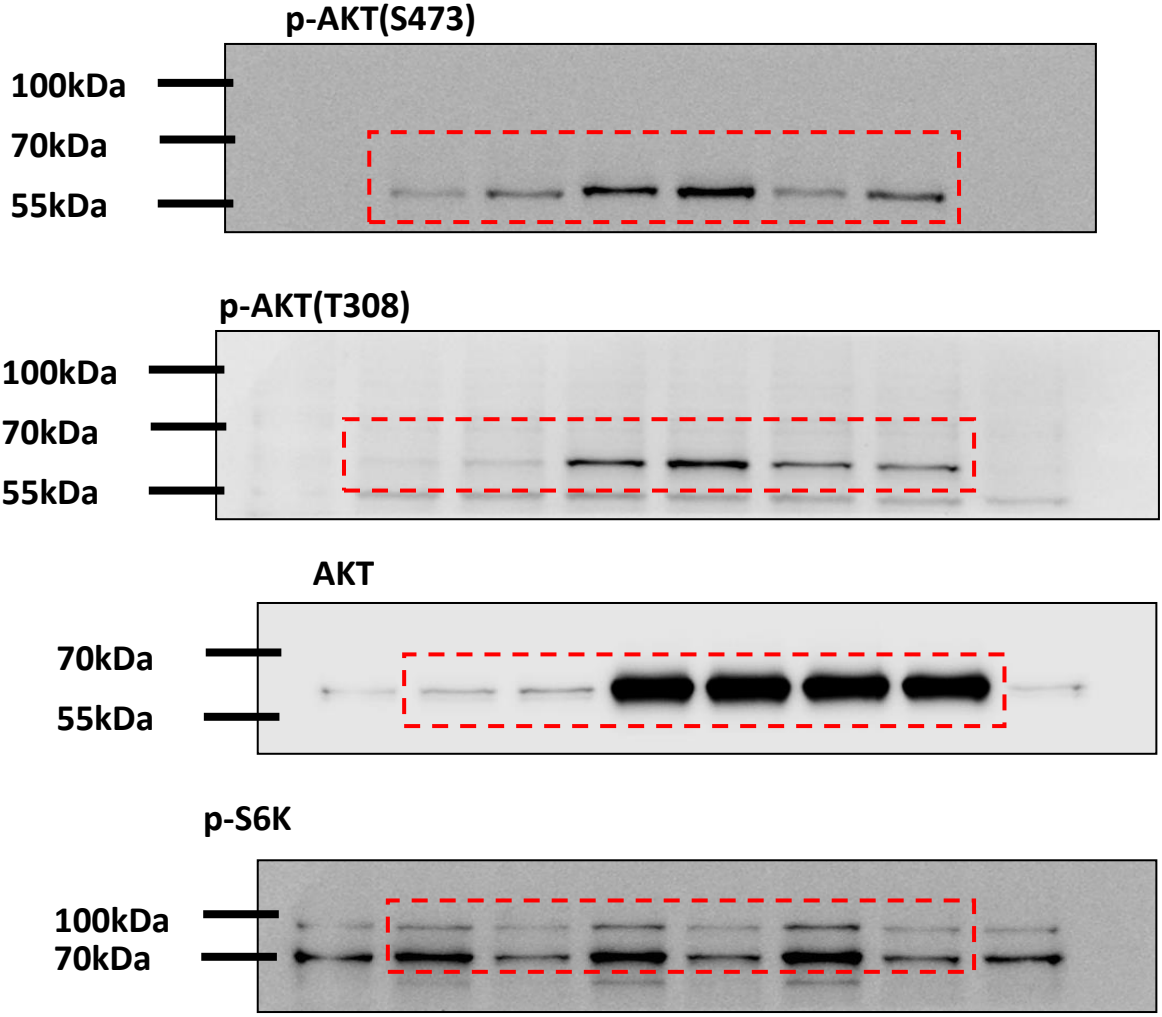

Figure 5B

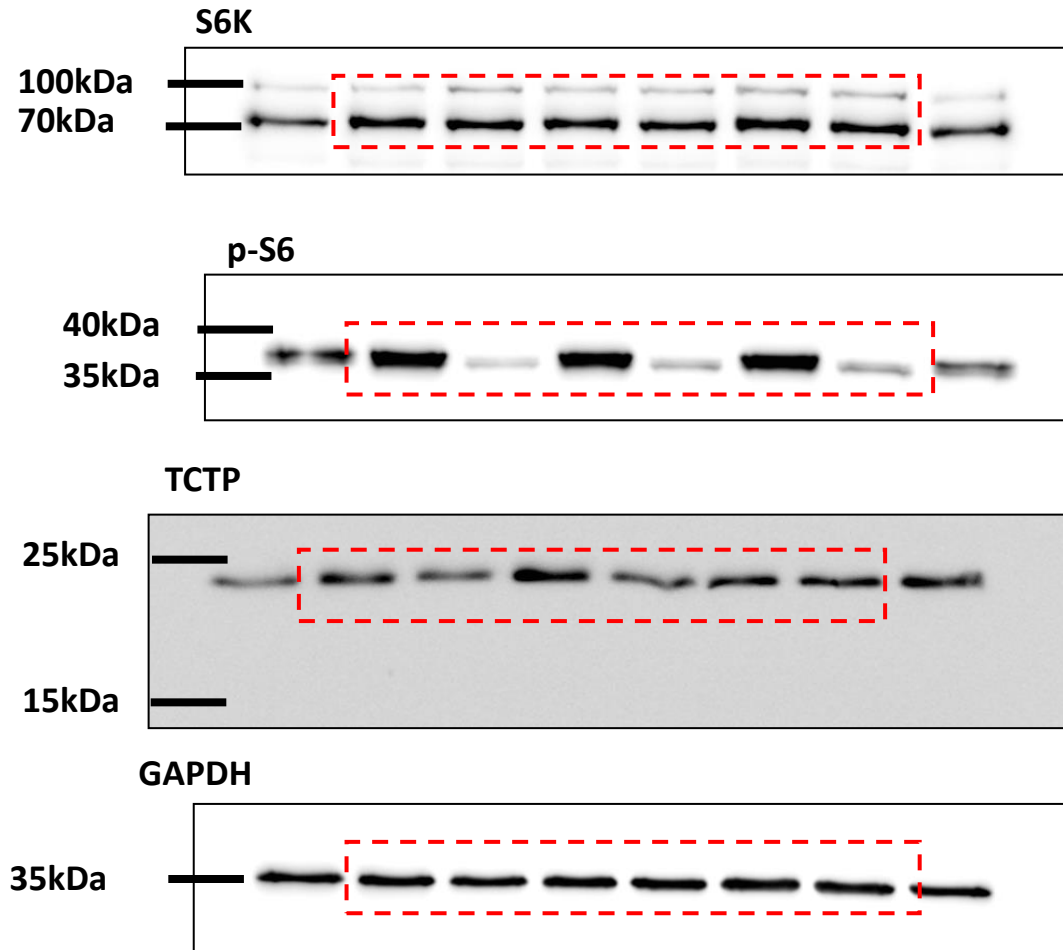



Figure 5C

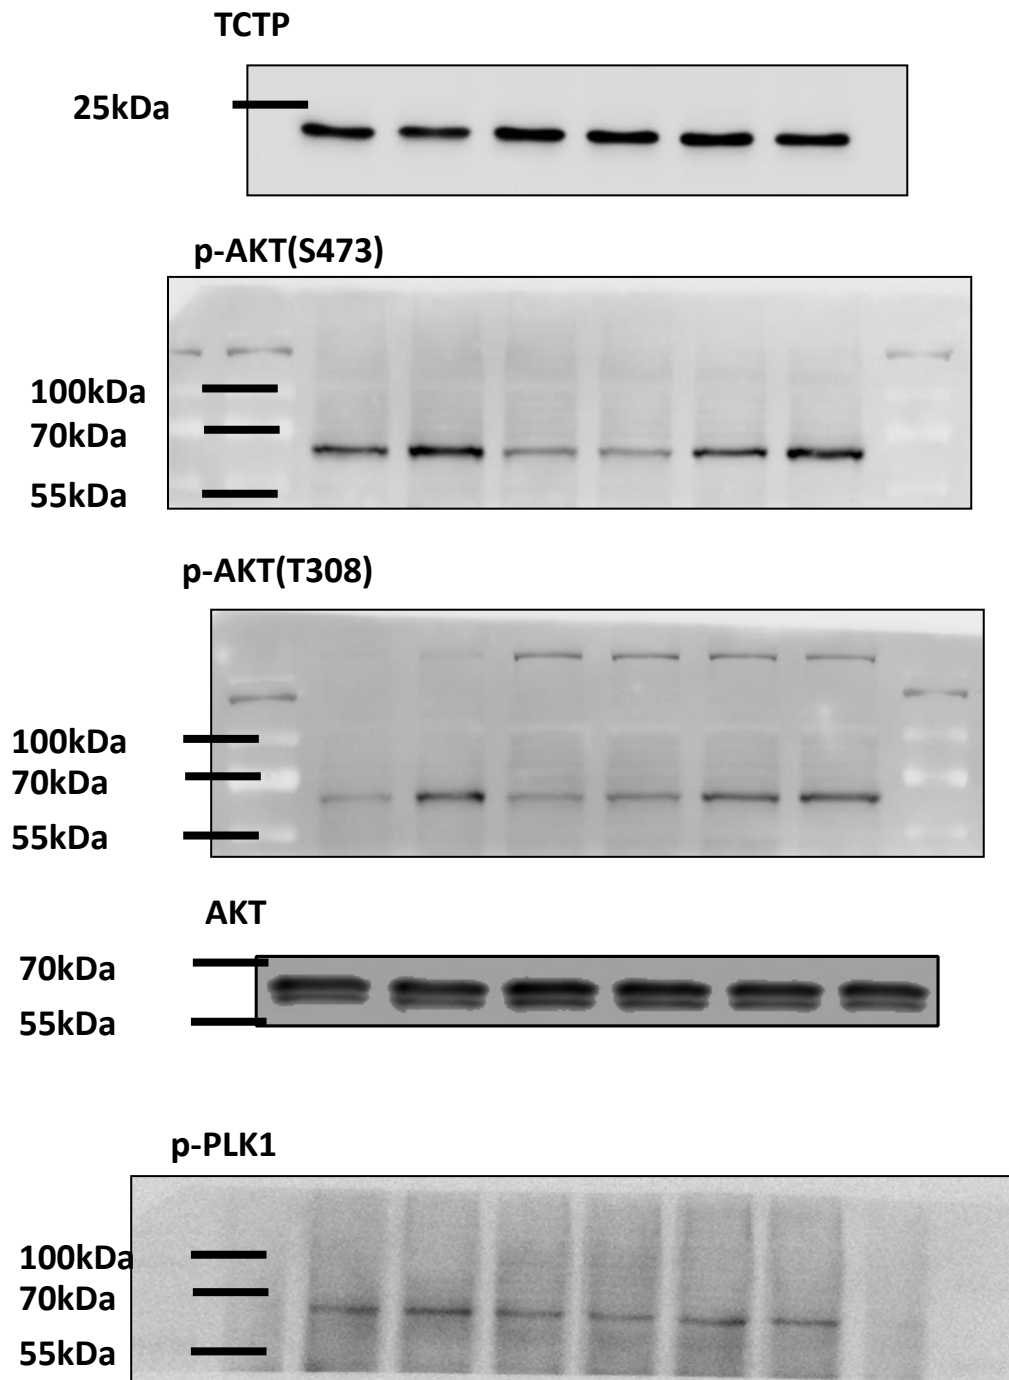

Figure 5C

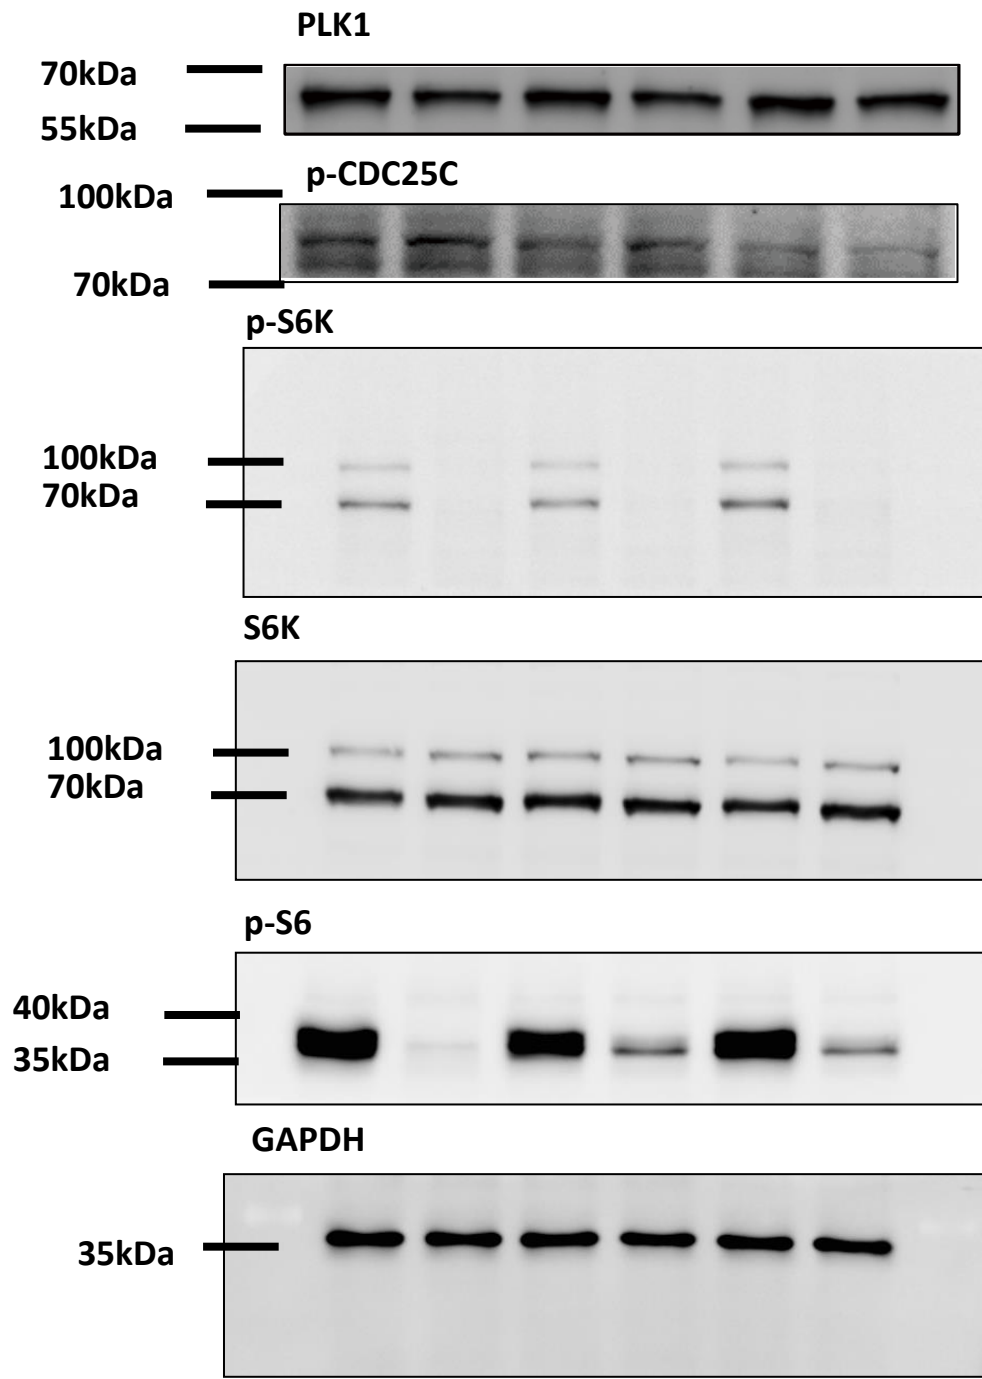

Figure 5D

p-AKT(S473)

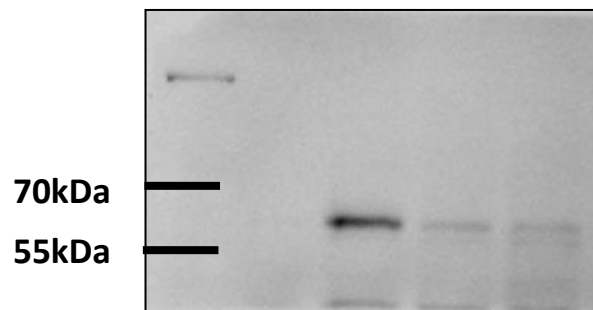

AKT

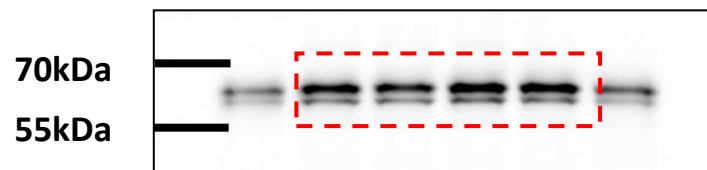

p-PLK1

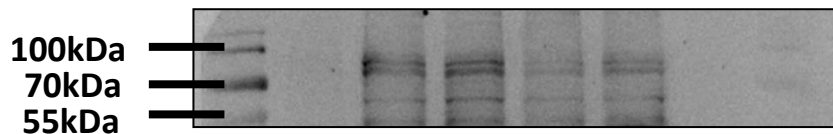

PLK1

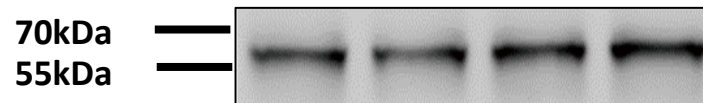

p-cdc25c

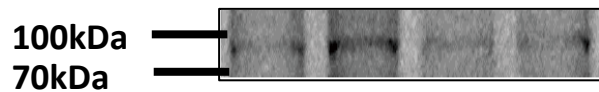

p-S6

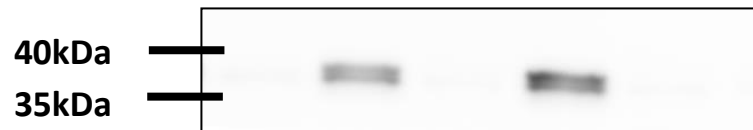

TCTP

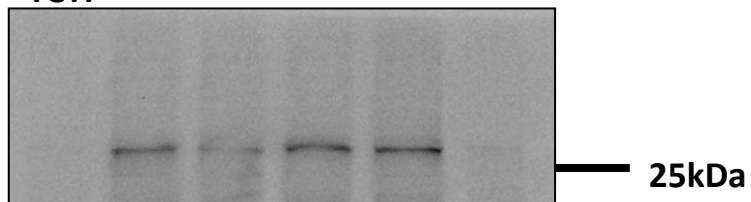

GAPDH

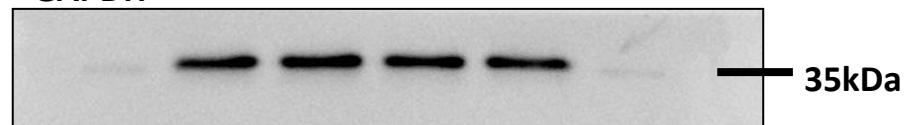

Figure 5E

TCTP

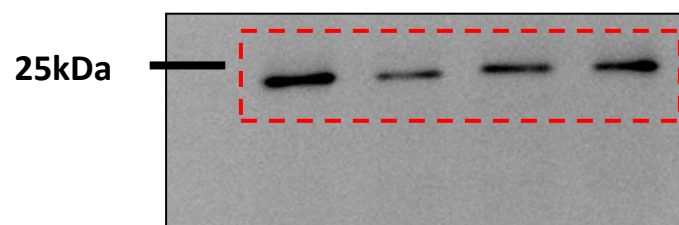

HA

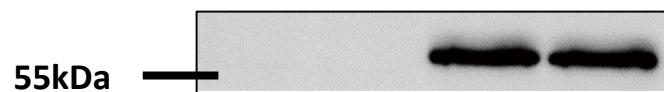

p-AKT(S473)

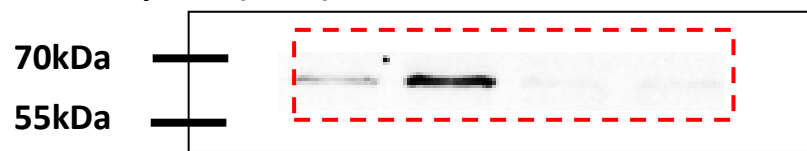

AKT

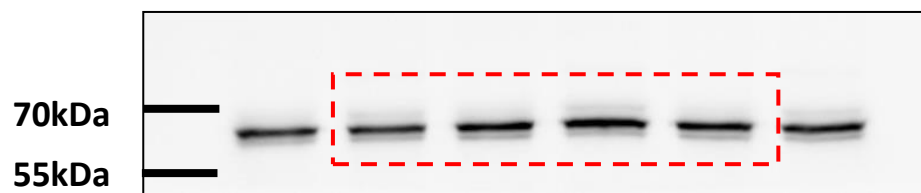

p-S6K

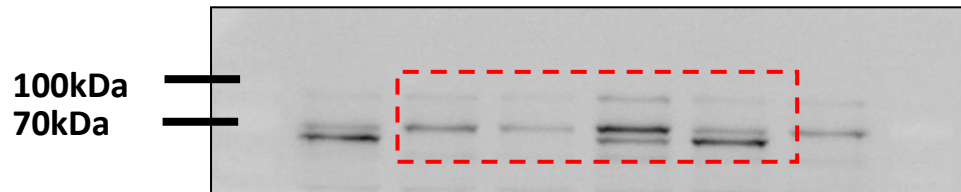

S6K

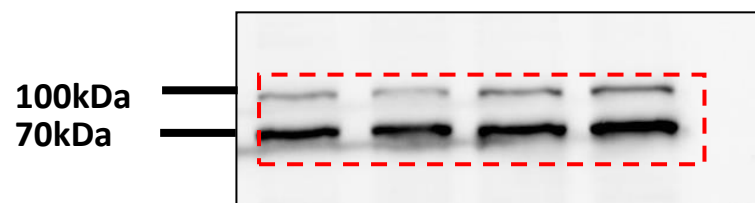

p-S6

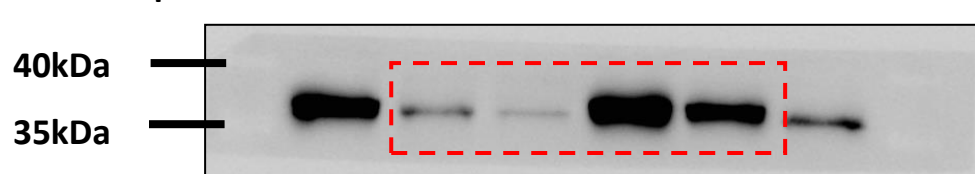

GAPDH

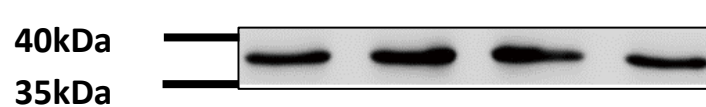

Figure 6B

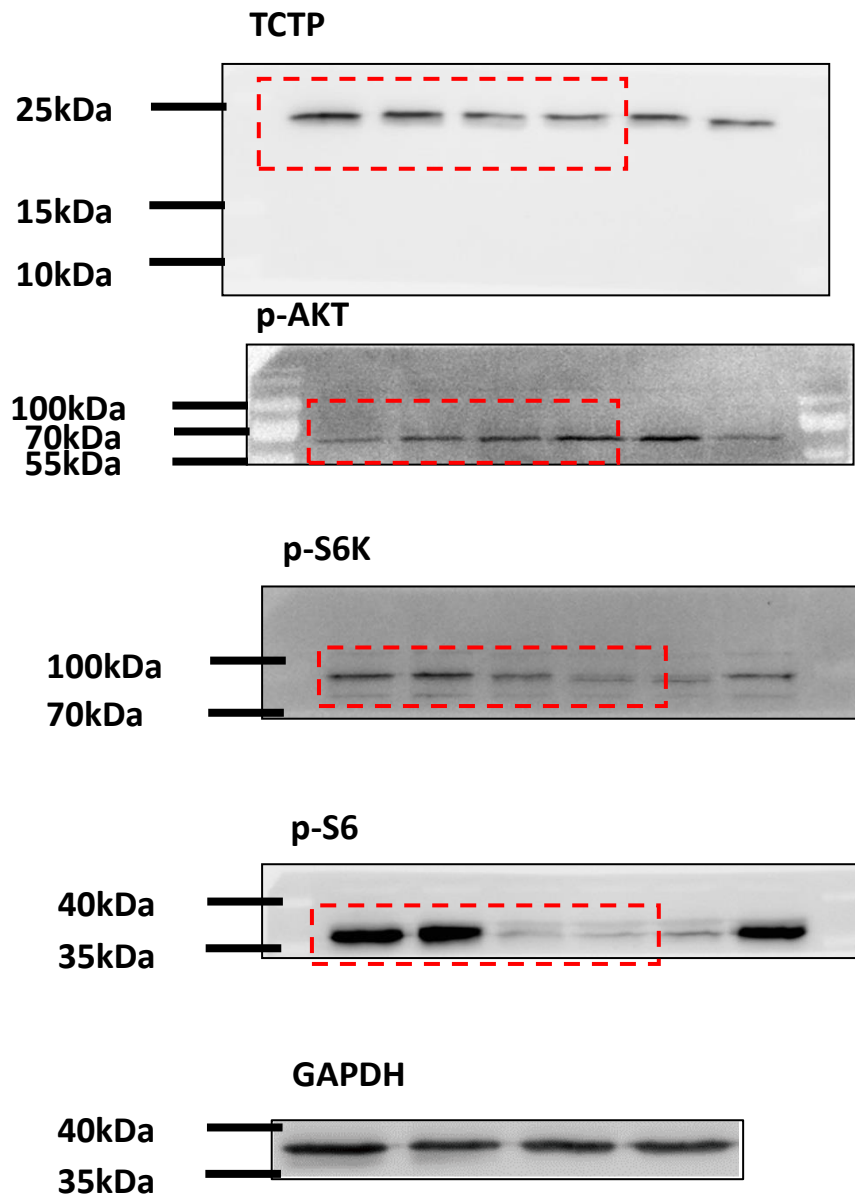

Figure 6D

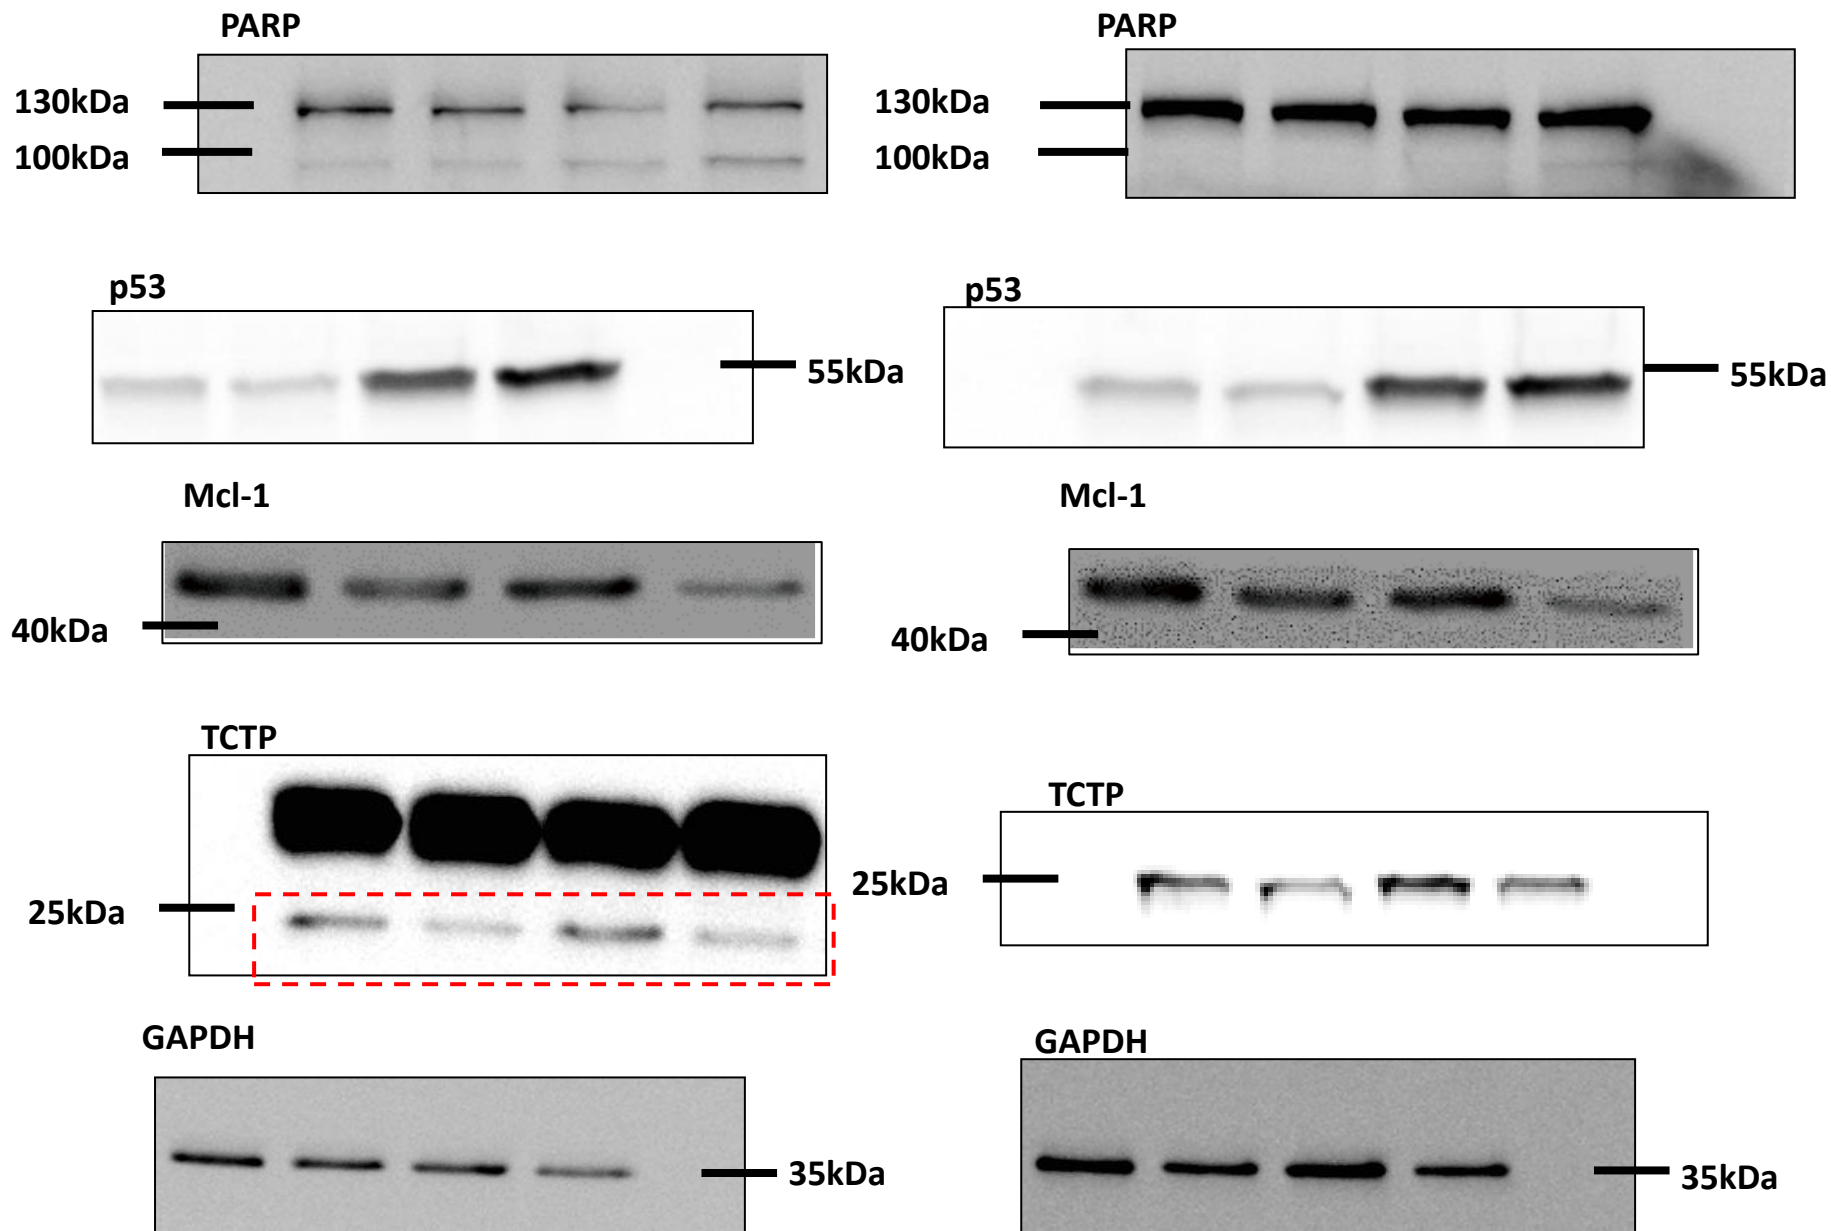



Supplementary Figure. S1

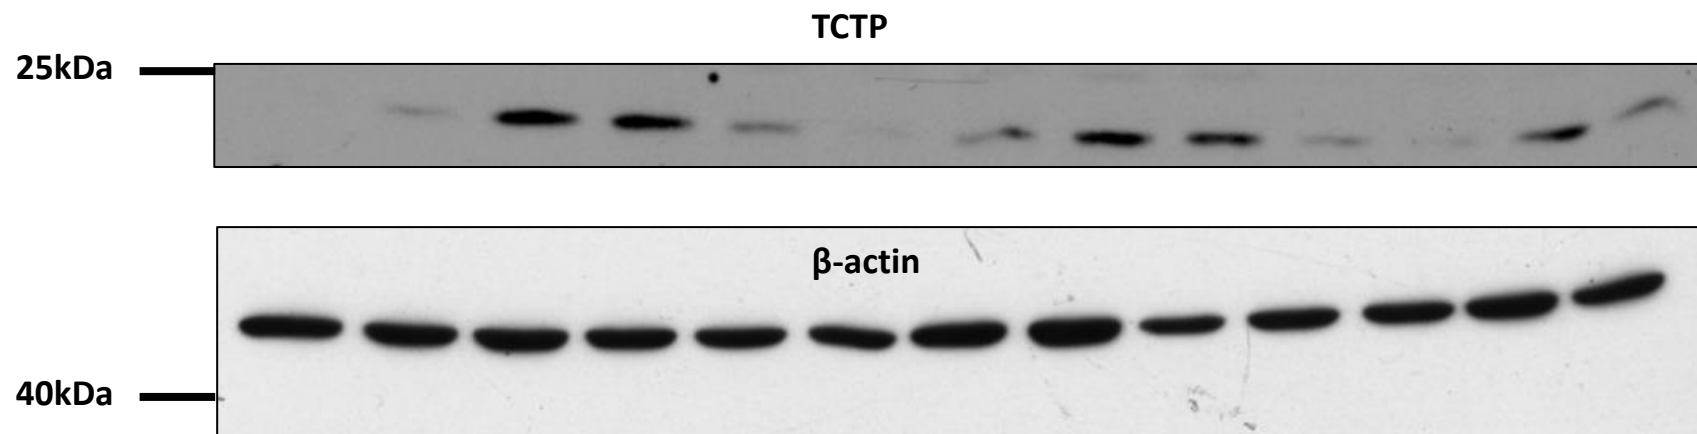



Supplementary Figure. S1 – replicate blot

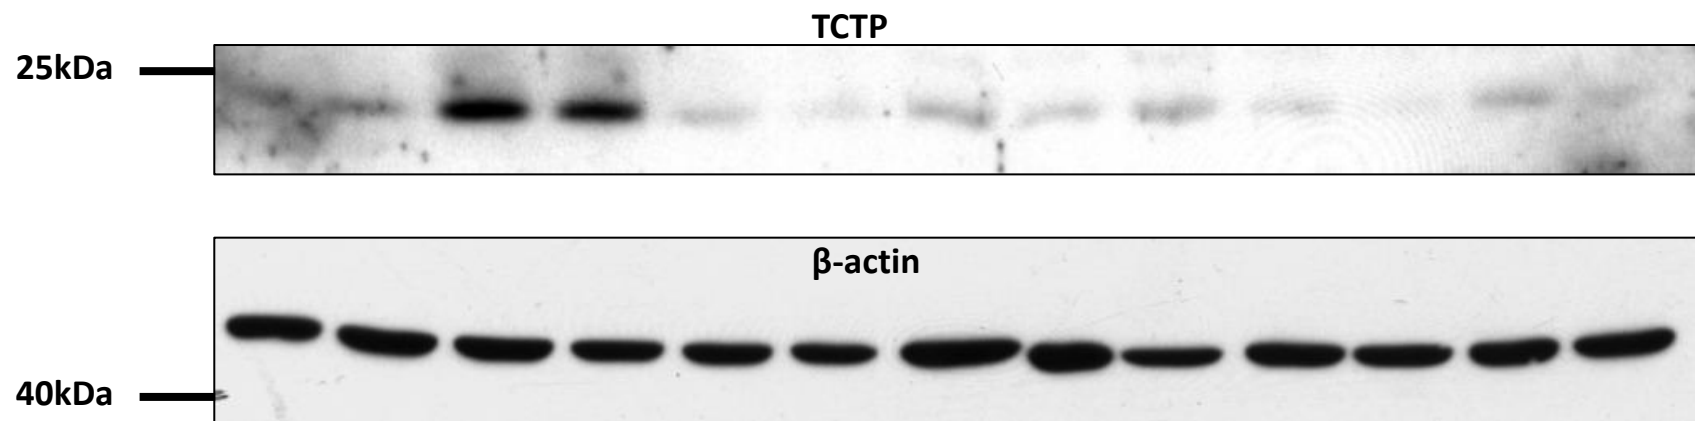

Supplementary Figure. S2A

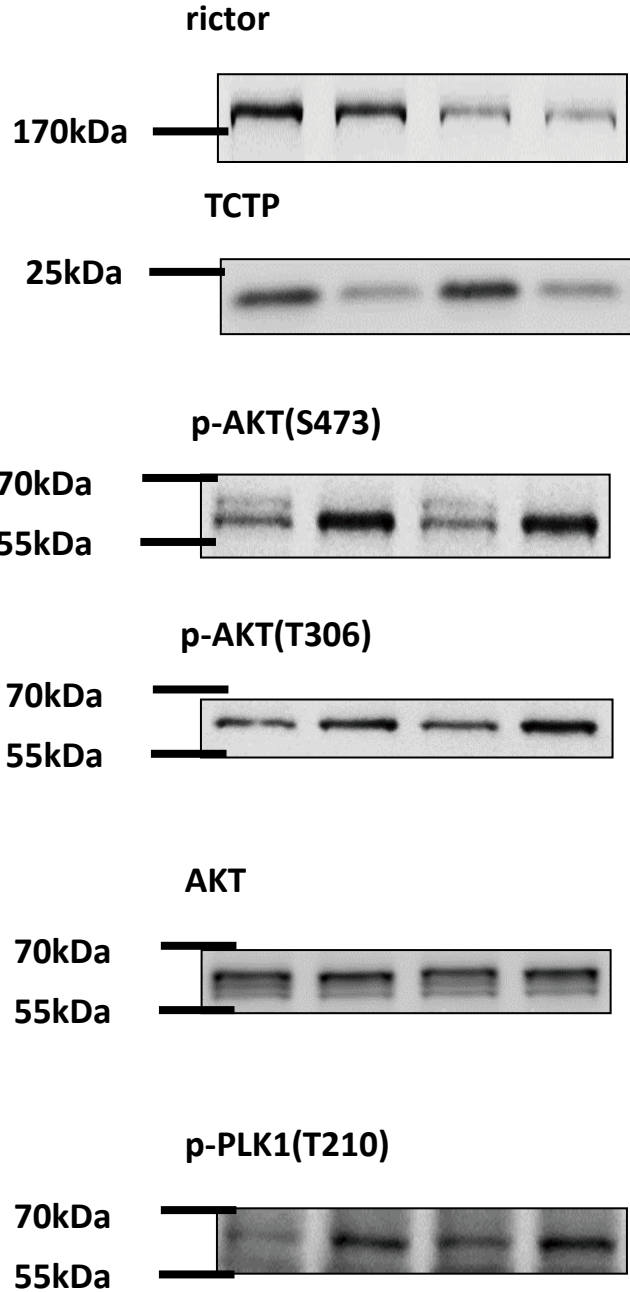

Supplementary Figure. S2A

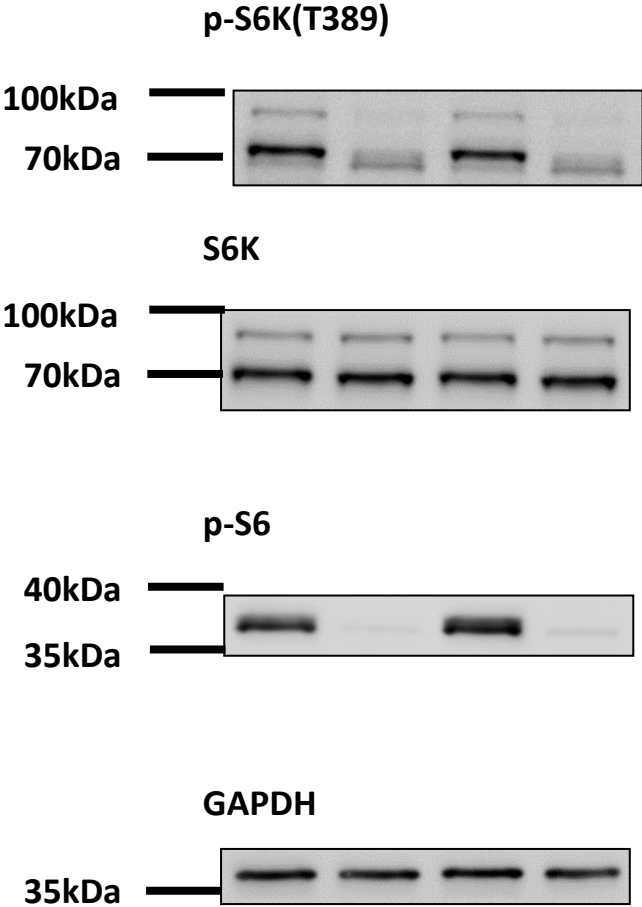

Supplementary Figure. S2A – replicate blot

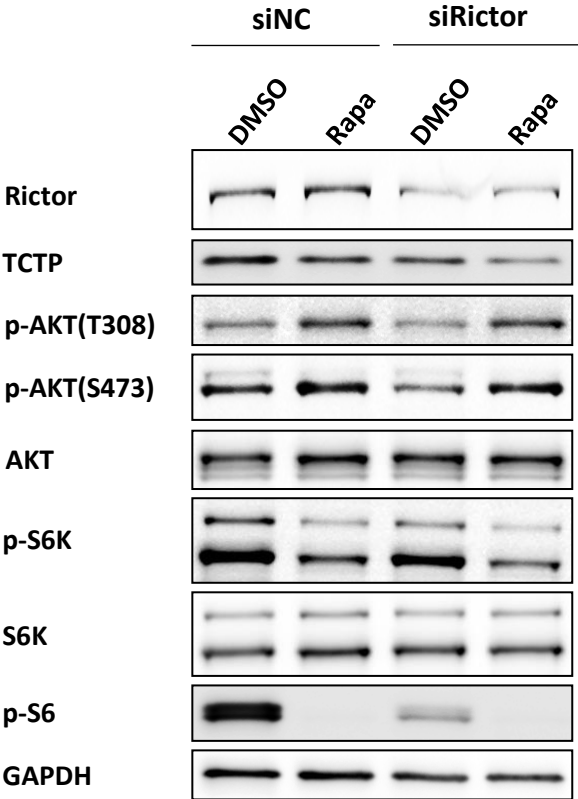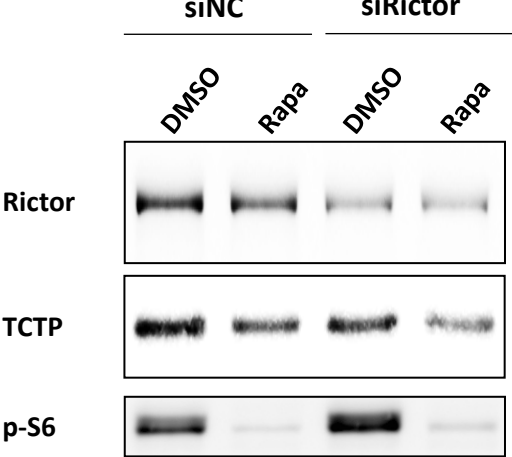

Supplementary Figure. S2B

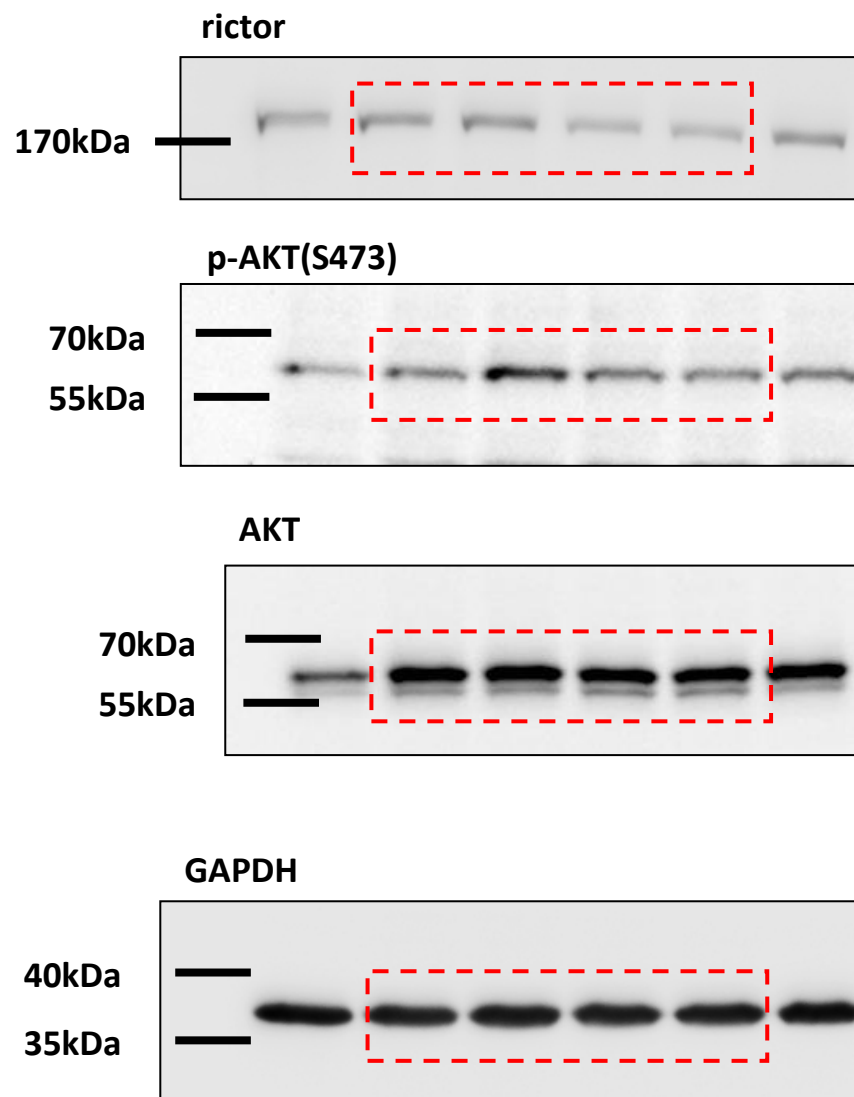

Supplementary Figure. S2B – replicate blot

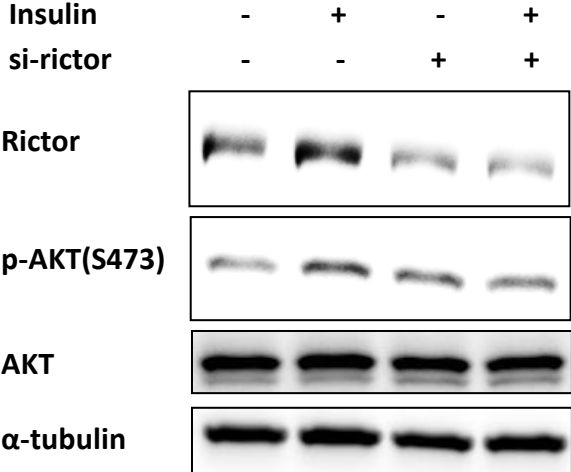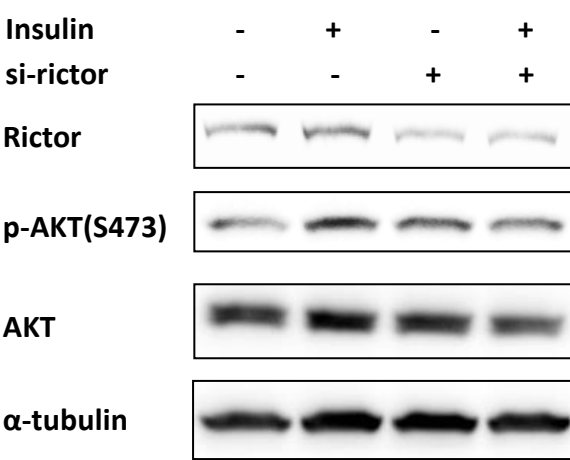

Supplementary Figure. S3A

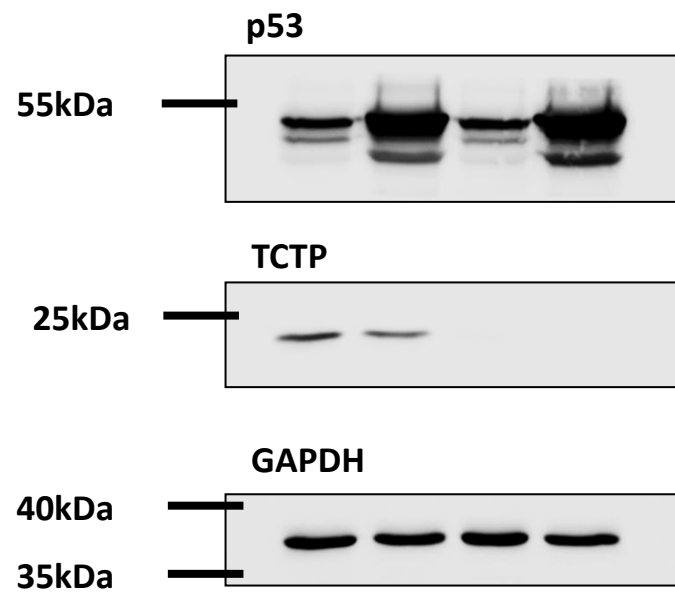

Supplementary Figure. S3B

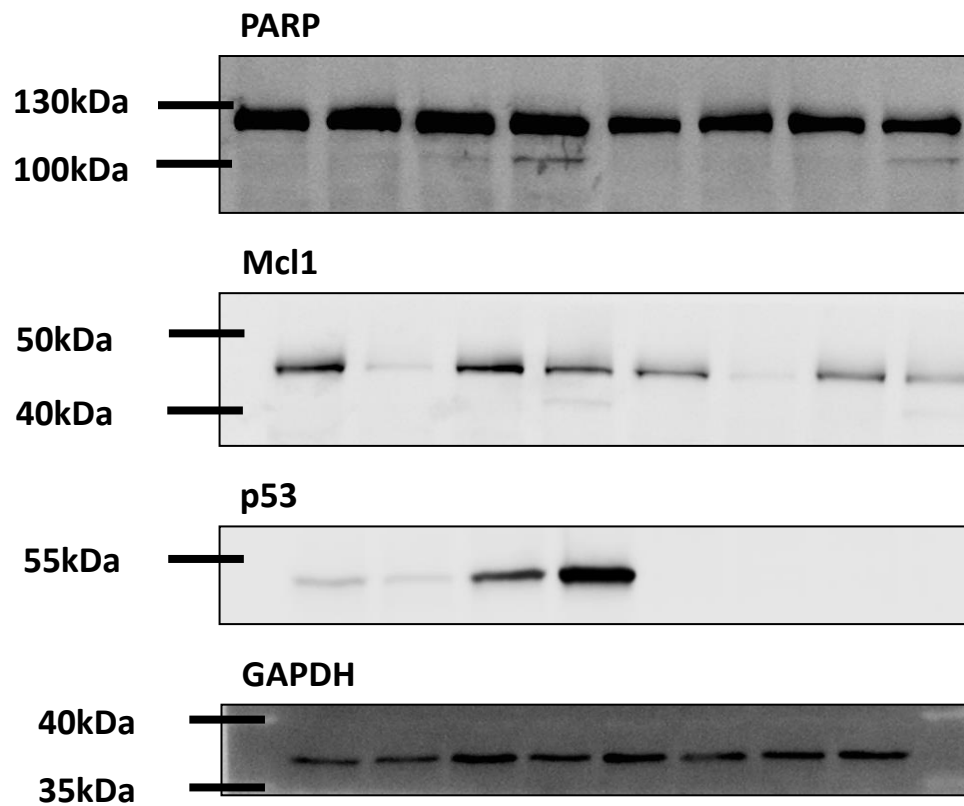



# Supplementary Figure. S3B – replicate blot

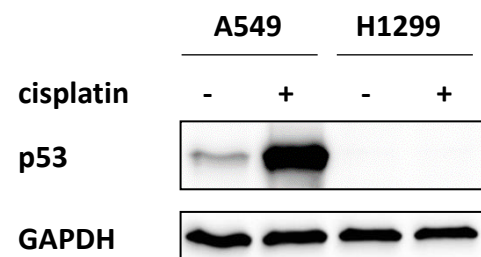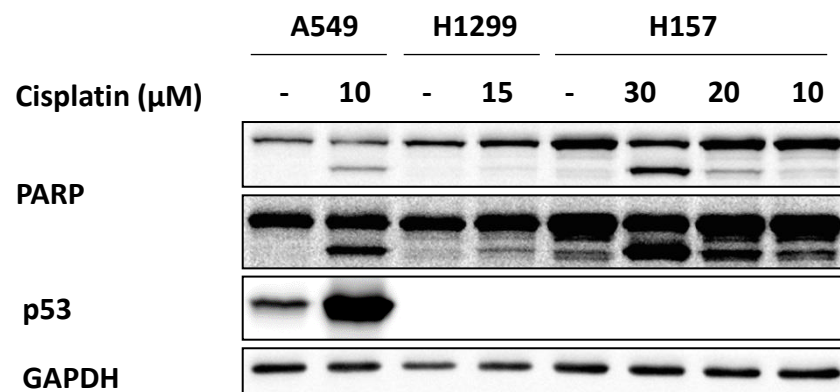

Supplementary Figure. S3C

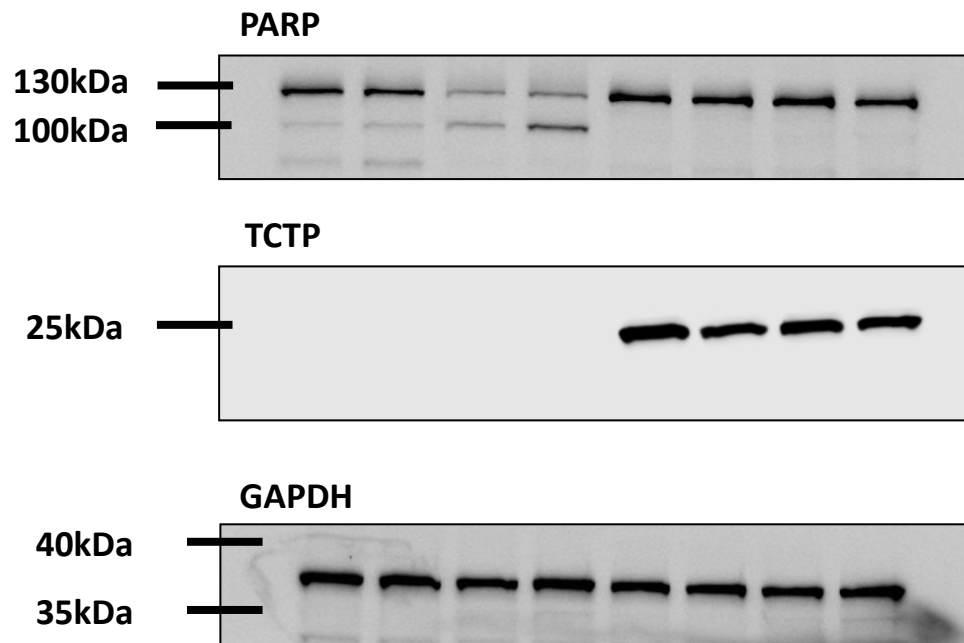

# Supplementary Figure. S3C – replicate blot

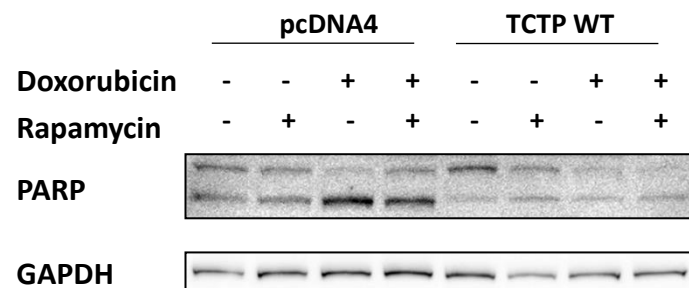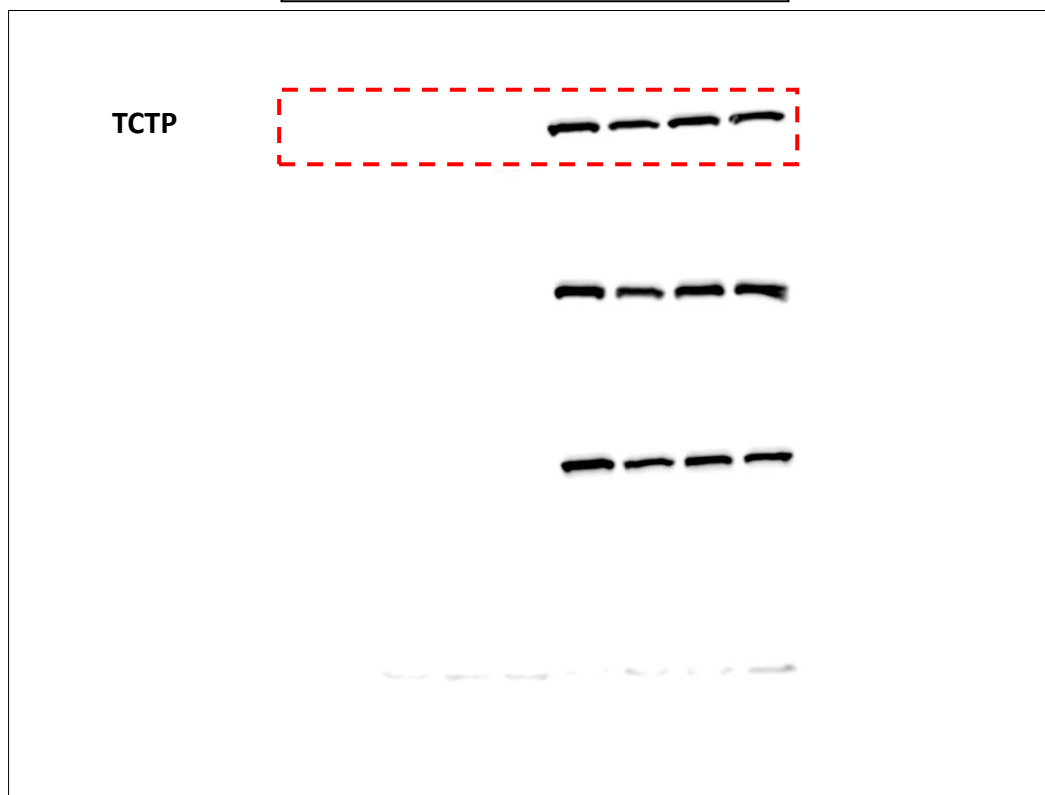

Supplementary Figure. S4C

TCTP

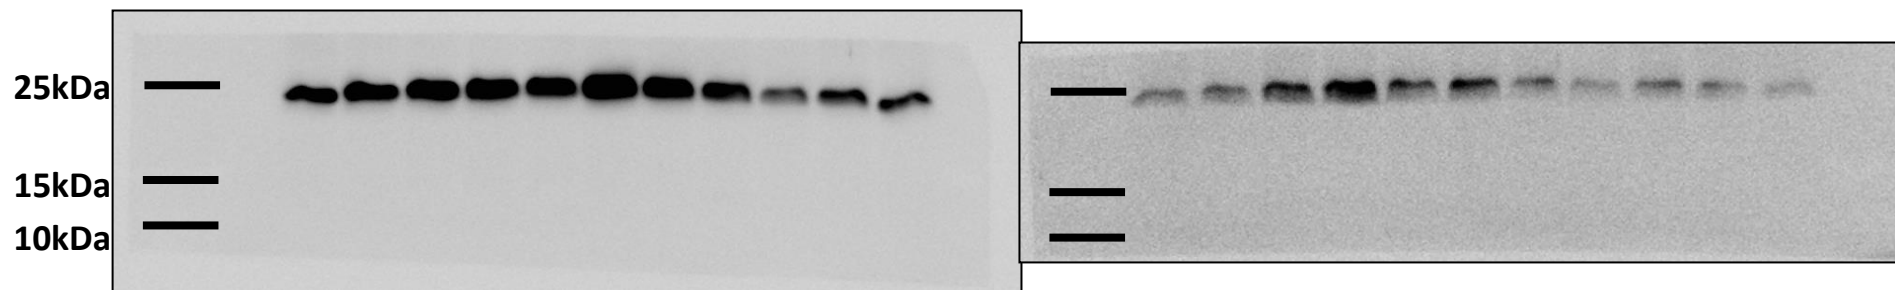

PARP

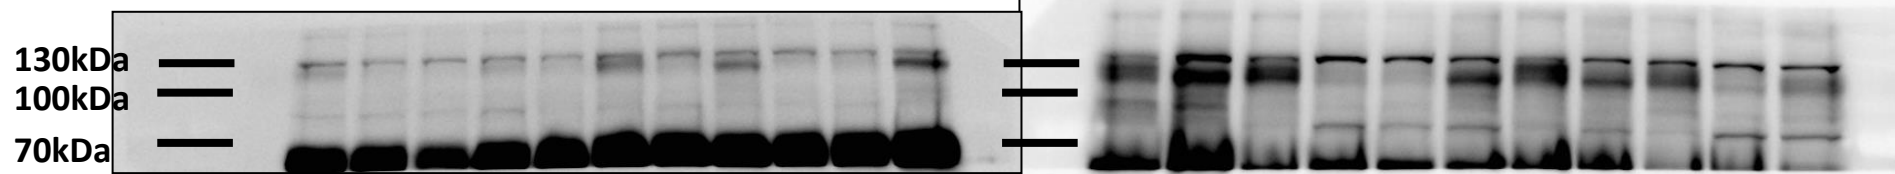

p53

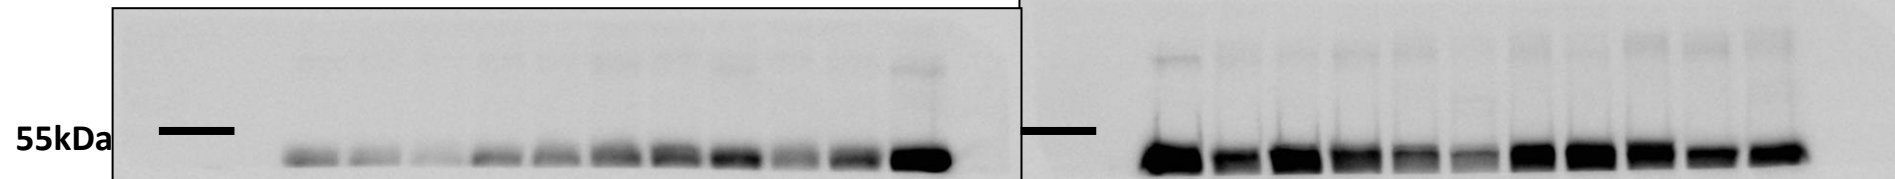

Mcl1

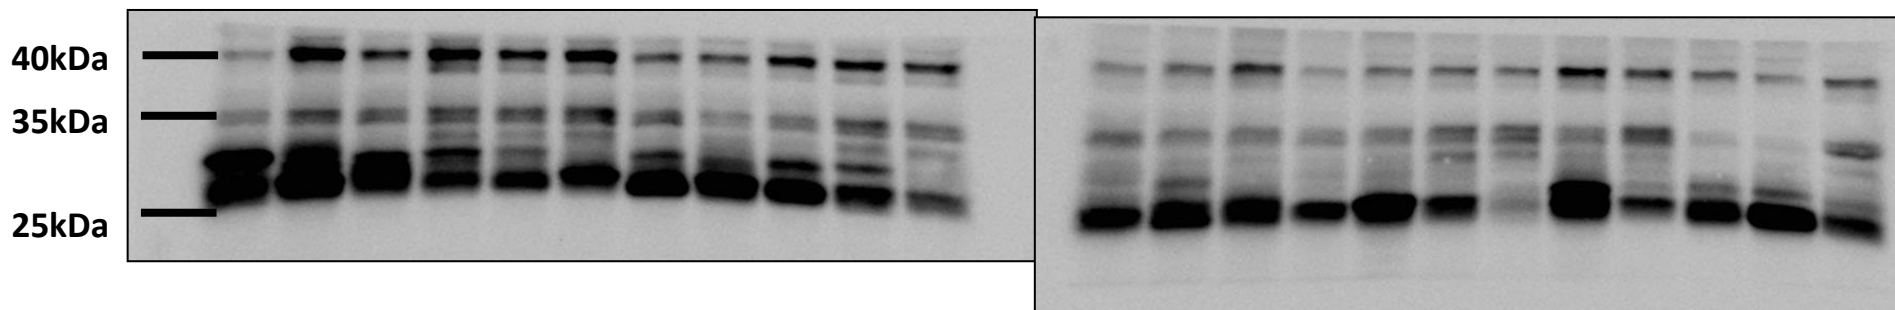

Supplementary Figure. S4C

p-AKT

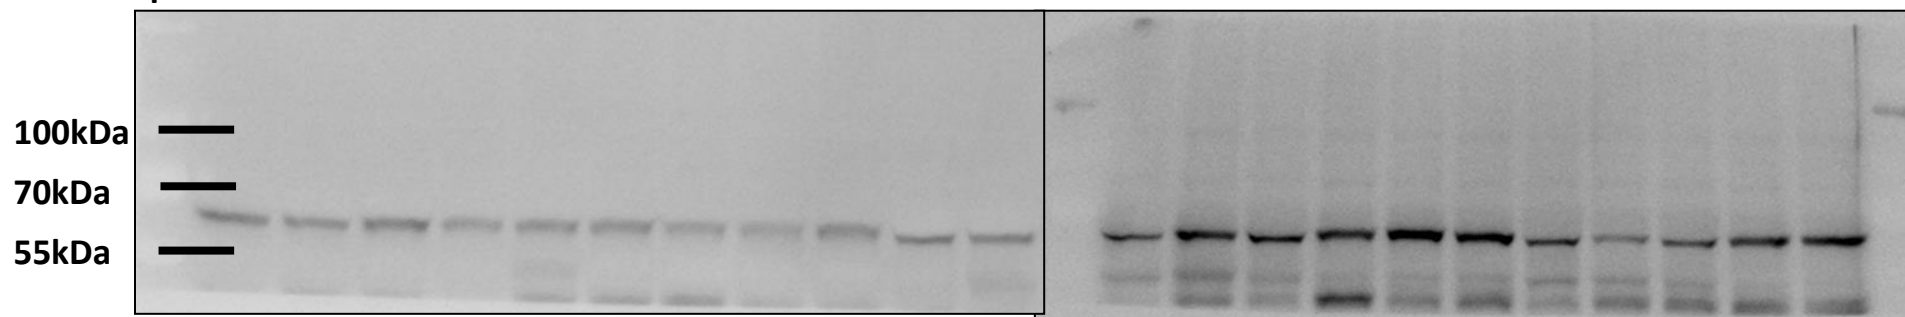

AKT

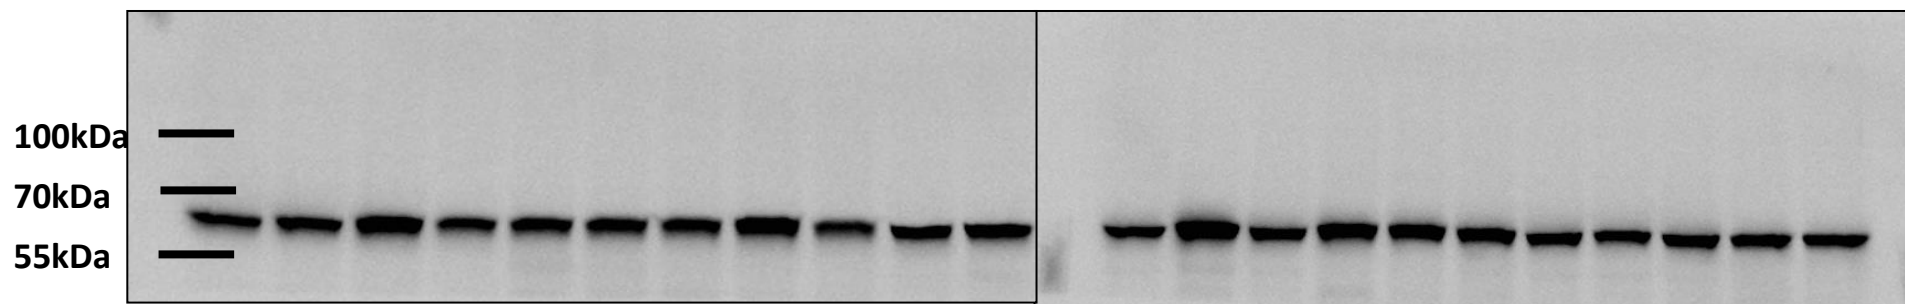

p-S6K

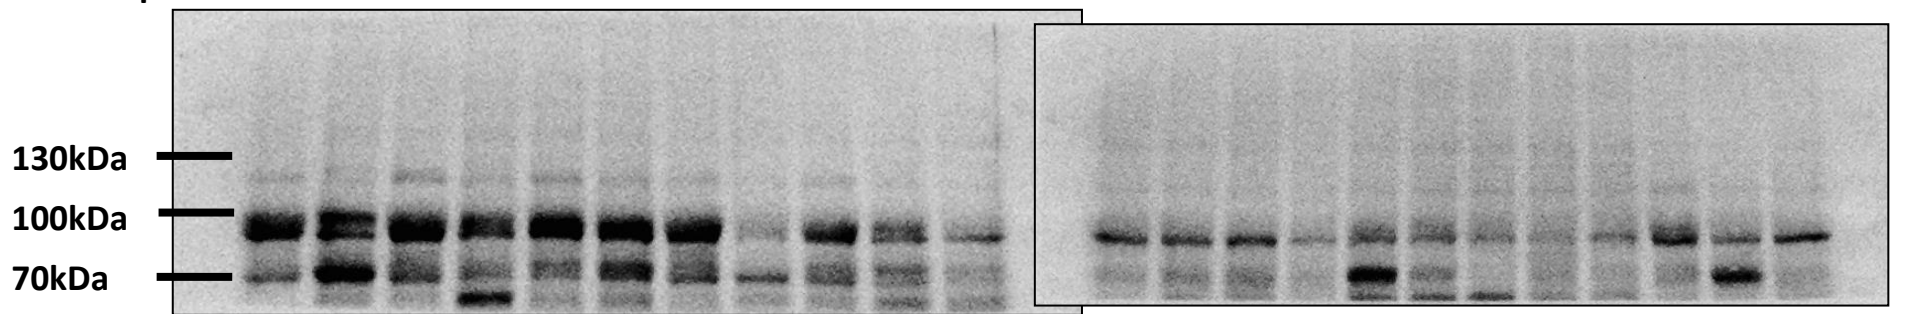

Supplimentary Figure. S4C

S6K

130kDa  
100kDa  
70kDa

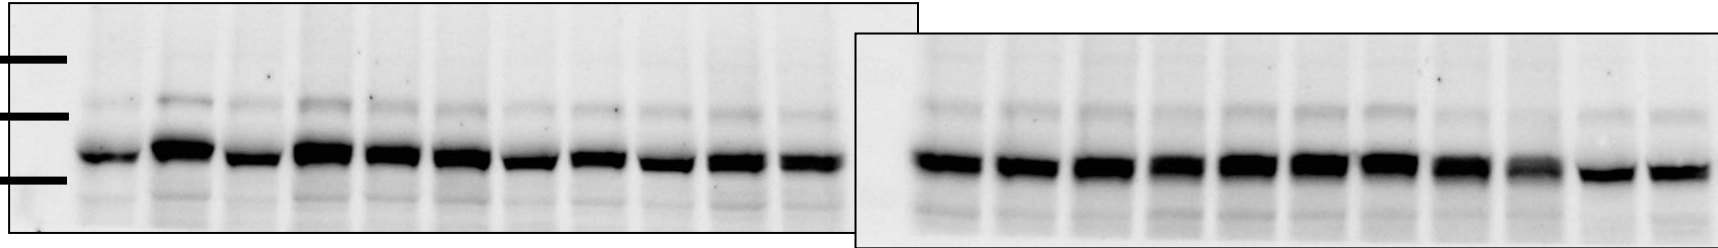

p-S6

40kDa  
35kDa  
25kDa

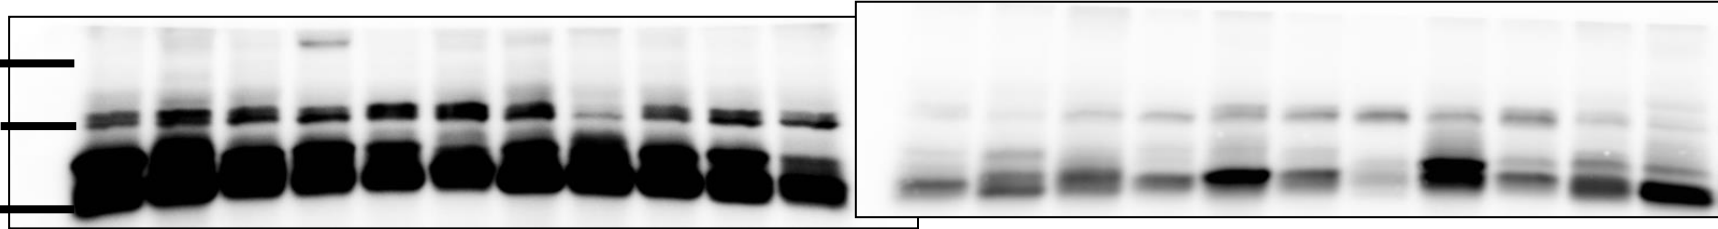

GAPDH

40kDa  
35kDa

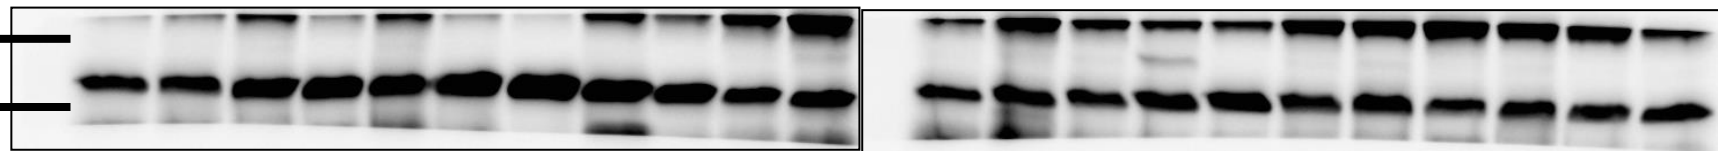

Supplimentary Figure. S4G

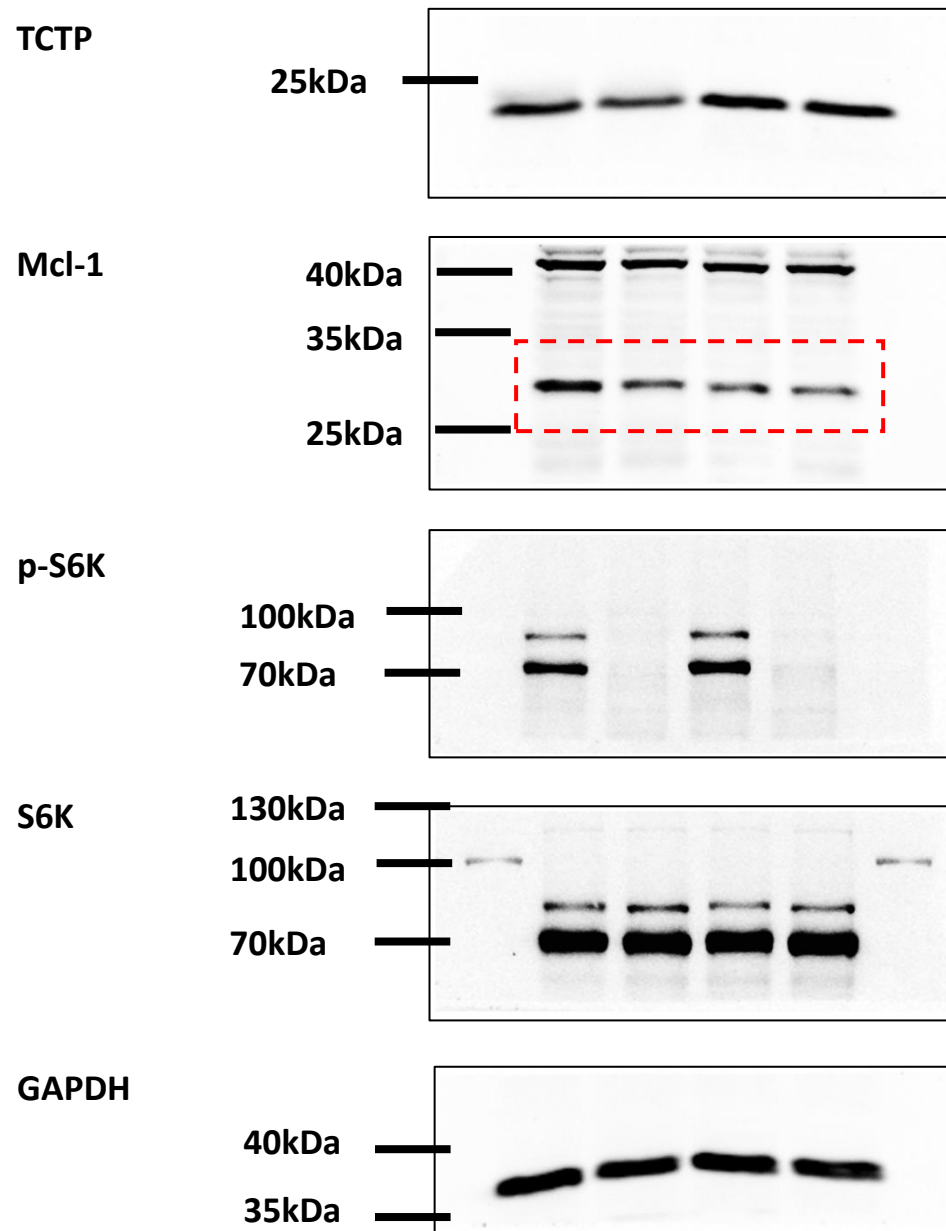

Supplement: 41598_2021_247_MOESM1_ESM.pdf [file 41598_2021_247_MOESM1_ESM.pdf]
